# Supplementary material for: Identification of the Key Factors Related to Bladder Cancer by lncRNA-miRNA-mRNA Three-Layer Network
Source: PubMed Central journal article supplement (PMC6997565; doi:10.3389/fgene.2019.01398), 2020-01-28

Table S1-All lncRNAs related to bladder cancer survival.

| id          | pvalue   | id         | pvalue  | id          | pvalue  |
|-------------|----------|------------|---------|-------------|---------|
| ADAMTS9-AS1 | 2.00E-05 | SATB2-AS1  | 0.00877 | AC061975.1  | 0.02548 |
| AP000894.2  | 2.00E-05 | MKX-AS1    | 0.00887 | AF015262.1  | 0.02568 |
| AC104785.1  | 2.00E-05 | LINC02416  | 0.00923 | AC092171.4  | 0.02617 |
| MAFG-DT     | 3.00E-05 | LINC00603  | 0.00924 | RNF144A-AS1 | 0.02624 |
| LINC01776   | 5.00E-05 | AC092376.2 | 0.00925 | AC104071.1  | 0.02629 |
| Z99289.1    | 8.00E-05 | AC005150.1 | 0.00929 | AC002398.2  | 0.02641 |
| ADAMTS9-AS2 | 9.00E-05 | LINC00351  | 0.0095  | AL157400.2  | 0.02647 |
| AP003500.1  | 0.00012  | AC018809.1 | 0.00974 | AC079313.2  | 0.02675 |
| AC239584.1  | 0.00016  | LINC01795  | 0.00996 | AC002546.1  | 0.02686 |
| AC005730.2  | 2.00E-04 | AL136084.3 | 0.01043 | AC012494.1  | 0.02688 |
| GAS6-DT     | 0.00023  | AP001189.3 | 0.011   | ST8SIA6-AS1 | 0.02714 |
| AL391704.1  | 0.00023  | AC005863.1 | 0.01108 | AL132655.2  | 0.02734 |
| AL079343.1  | 0.00031  | AP001189.1 | 0.01115 | AC011510.1  | 0.0274  |
| LINC01767   | 0.00041  | AC090673.1 | 0.01149 | AL139002.1  | 0.02748 |
| AC108025.2  | 0.00041  | CASC22     | 0.01167 | AC092325.1  | 0.02751 |
| AC021546.1  | 0.00044  | AC105053.1 | 0.01205 | STAM-AS1    | 0.02823 |
| AC010331.1  | 0.00053  | LINC02262  | 0.01213 | AC015660.1  | 0.02853 |
| WASIR2      | 0.00069  | PSORS1C3   | 0.01226 | AC090159.1  | 0.02866 |
| MIR99AHG    | 0.00071  | AC104126.1 | 0.01234 | AC015712.2  | 0.02912 |
| AC068196.1  | 0.00114  | AF111167.2 | 0.01288 | AL359979.1  | 0.02951 |
| LINC00702   | 0.00115  | AC120049.1 | 0.01301 | AC009060.1  | 0.0297  |
| AC090673.2  | 0.00116  | LINC00683  | 0.01329 | TARID       | 0.02971 |
| MIR100HG    | 0.00125  | AC025259.3 | 0.01343 | MAGI2-AS3   | 0.0301  |
| AP002884.1  | 0.00131  | AC120498.2 | 0.01351 | AC012603.1  | 0.03055 |
| LINC01154   | 0.00137  | LINC02522  | 0.01399 | AC124276.2  | 0.03092 |
| HCG22       | 0.00138  | RORB-AS1   | 0.01431 | AC004704.1  | 0.031   |
| AC002454.1  | 0.00141  | AL592429.2 | 0.01435 | AC118755.2  | 0.03109 |

|            |         |            |         |            |         |
|------------|---------|------------|---------|------------|---------|
| UBE2Q1-AS1 | 0.0016  | AC079630.1 | 0.01438 | AC097512.1 | 0.03116 |
| LINC02434  | 0.00167 | AC254629.1 | 0.01461 | LEMD1-AS1  | 0.03169 |
| LINC01197  | 0.00177 | LINC01705  | 0.01471 | AC092811.1 | 0.03183 |
| LINC01647  | 0.00177 | AL161431.1 | 0.01478 | SMC2-AS1   | 0.03184 |
| AC010643.1 | 0.00183 | AC013457.1 | 0.0148  | AP005230.1 | 0.03206 |
| LINC01936  | 0.00201 | AC093627.1 | 0.01491 | MIR137HG   | 0.03218 |
| AC022028.2 | 0.00207 | AC116025.2 | 0.01539 | G2E3-AS1   | 0.03273 |
| AL355102.1 | 0.00211 | AC103740.1 | 0.01568 | LINC00698  | 0.03318 |
| AC093390.1 | 0.00217 | AC073174.1 | 0.01571 | MIR9-3HG   | 0.03323 |
| AP000864.1 | 0.00222 | AC012085.2 | 0.01573 | AP001628.2 | 0.03327 |
| MEF2C-AS1  | 0.00247 | AC092957.1 | 0.01577 | AC022613.1 | 0.03328 |
| AC053503.4 | 0.00258 | AL161729.3 | 0.01592 | BVES-AS1   | 0.03352 |
| AL513218.1 | 0.00289 | LINC02587  | 0.0162  | AC116345.1 | 0.03357 |
| PTPRD-AS1  | 0.00306 | AC008708.2 | 0.01647 | AC026333.4 | 0.03398 |
| AL512785.1 | 0.00316 | NCAM1-AS1  | 0.01678 | AC126178.1 | 0.03442 |
| AC002059.1 | 0.00326 | AC017083.1 | 0.01682 | AC112484.3 | 0.03462 |
| LINC01833  | 0.00347 | FLJ36000   | 0.01689 | AC008403.3 | 0.03521 |
| LINC02067  | 0.00358 | AC017048.2 | 0.01691 | LINC02584  | 0.03561 |
| AC009093.4 | 0.00362 | AL031665.1 | 0.01732 | LINC00973  | 0.03591 |
| CARMN      | 0.00365 | AC092794.2 | 0.01735 | LINC02074  | 0.03605 |
| AC078778.1 | 0.00387 | AC023908.3 | 0.0175  | AC048337.1 | 0.037   |
| LINC01179  | 0.00388 | AC007495.1 | 0.0177  | AC243773.1 | 0.03713 |
| AC011298.1 | 0.00392 | AC099066.2 | 0.01771 | NKILA      | 0.03755 |
| AL133255.1 | 0.00397 | AC026369.1 | 0.01779 | AF121898.1 | 0.0386  |
| SIRLNT     | 0.00401 | C7orf65    | 0.01817 | AC044784.1 | 0.03879 |
| AP003721.1 | 0.00436 | AC026124.1 | 0.0182  | AC005180.1 | 0.03906 |
| AC079466.1 | 0.00446 | AC093895.1 | 0.01863 | NRIR       | 0.03907 |
| AL590079.1 | 0.00459 | SOX2-OT    | 0.01911 | AC110285.6 | 0.0392  |
| AL355488.1 | 0.00477 | AC107959.1 | 0.01937 | AC099850.3 | 0.03957 |

|            |         |              |         |            |         |
|------------|---------|--------------|---------|------------|---------|
| SACS-AS1   | 0.0048  | AC005064.1   | 0.01948 | DSCAS      | 0.04012 |
| AL139130.1 | 0.00497 | AC019211.1   | 0.01959 | DNAH17-AS1 | 0.04022 |
| AC025176.1 | 0.00498 | LINC01352    | 0.01967 | AC016705.2 | 0.04034 |
| AL356270.1 | 0.0051  | AC026691.1   | 0.01987 | AC130456.1 | 0.04169 |
| LINC00536  | 0.00518 | AC017076.1   | 0.01989 | AC018904.1 | 0.04189 |
| AL355472.4 | 0.00519 | AL390729.1   | 0.02052 | LINC02195  | 0.04211 |
| LINC01929  | 0.00526 | AL136172.1   | 0.02058 | AC105219.1 | 0.04232 |
| ELDR       | 0.00534 | AL355075.4   | 0.02059 | AC016745.1 | 0.04253 |
| AC016773.1 | 0.00544 | LINC01605    | 0.02082 | AC068473.4 | 0.04323 |
| LINC00967  | 0.00544 | AL356489.2   | 0.02097 | AC092118.1 | 0.04399 |
| AP001107.5 | 0.0055  | AC004803.1   | 0.02103 | AC108515.1 | 0.0443  |
| AP000851.1 | 0.0058  | AP000697.1   | 0.02177 | AC025280.1 | 0.04446 |
| AATBC      | 0.00666 | LINC00460    | 0.02196 | AC018716.1 | 0.04466 |
| AL513329.1 | 0.00689 | AC104123.1   | 0.02204 | LINC01978  | 0.04491 |
| TTY16      | 0.007   | AC009646.2   | 0.02206 | AC013553.3 | 0.04562 |
| AL122035.1 | 0.00701 | AC092484.1   | 0.02271 | AC011294.1 | 0.04577 |
| AL589765.6 | 0.00704 | LINC00879    | 0.02291 | AC100858.3 | 0.04585 |
| MYO16-AS1  | 0.00704 | AC005746.3   | 0.02301 | TRPM2-AS   | 0.04603 |
| AC110491.1 | 0.00717 | AL603832.1   | 0.02373 | AC007773.1 | 0.04755 |
| AC008063.2 | 0.00728 | AC246817.1   | 0.02384 | LINC02269  | 0.04757 |
| LINC02167  | 0.00753 | AC011511.3   | 0.02414 | AC018521.6 | 0.04759 |
| AL353801.3 | 0.00768 | LINC02544    | 0.0244  | AC124069.1 | 0.0477  |
| AL078587.1 | 0.00773 | AC116348.2   | 0.02455 | AC127496.3 | 0.04777 |
| AC112721.1 | 0.00808 | AL139089.1   | 0.02476 | AC025431.1 | 0.04792 |
| AL158209.1 | 0.00817 | AC034223.2   | 0.02479 | AL161668.3 | 0.04854 |
| SIRPG-AS1  | 0.00825 | LNCAROD      | 0.02481 | LINC02256  | 0.04859 |
| LINC01385  | 0.00865 | AC023824.1   | 0.02529 | DLEU1-AS1  | 0.04862 |
| AL024507.2 | 0.00868 | TMEM132D-AS1 | 0.02545 | LINC01952  | 0.04937 |
| AC011921.1 | 0.00871 |              |         |            |         |

Table S2-All miRNAs related to bladder cancer survival.

| id             | pvalue   | id             | pvalue   | id            | pvalue  |
|----------------|----------|----------------|----------|---------------|---------|
| hsa-mir-143    | 0.00707  | hsa-mir-125b-2 | 3.00E-04 | hsa-mir-3065  | 0.00122 |
| hsa-mir-195    | 0.04673  | hsa-mir-99a    | 0.00193  | hsa-mir-4449  | 0.03327 |
| hsa-mir-133b   | 0.00762  | hsa-mir-6507   | 0.01993  | hsa-mir-521-2 | 0.0182  |
| hsa-mir-504    | 0.01008  | hsa-mir-651    | 0.00251  | hsa-mir-6715b | 0.03837 |
| hsa-let-7c     | 0.00293  | hsa-mir-192    | 0.01846  | hsa-mir-3189  | 0.02797 |
| hsa-mir-145    | 0.01139  | hsa-mir-33b    | 0.01816  | hsa-mir-4636  | 0.02648 |
| hsa-mir-548ba  | 0.01102  | hsa-mir-490    | 0.0429   | hsa-mir-944   | 0.00065 |
| hsa-mir-93     | 0.01348  | hsa-mir-4664   | 0.00369  | hsa-mir-6728  | 0.00142 |
| hsa-mir-425    | 0.03339  | hsa-mir-3934   | 0.01955  | hsa-mir-217   | 0.01663 |
| hsa-mir-1258   | 0.04334  | hsa-mir-3200   | 0.04676  | hsa-mir-449b  | 0.03815 |
| hsa-mir-7705   | 6.00E-05 | hsa-mir-200b   | 0.04014  | hsa-mir-216a  | 0.00022 |
| hsa-mir-33a    | 0.00632  | hsa-mir-200c   | 0.00302  | hsa-mir-1224  | 0.04172 |
| hsa-mir-125b-1 | 0.00035  | hsa-mir-3913-1 | 0.01453  |               |         |

Table S3-All mRNAs related to bladder cancer.

| id      | pvalue   | id      | pvalue  | id      | pvalue  |
|---------|----------|---------|---------|---------|---------|
| HSPB6   | 1.00E-05 | CLDN6   | 0.00664 | MRGPRF  | 0.02219 |
| EMP1    | 1.00E-05 | E2F8    | 0.00665 | KRT14   | 0.02223 |
| TCHHL1  | 1.00E-05 | PCDH7   | 0.00671 | C6orf15 | 0.02236 |
| KLK5    | 2.00E-05 | SCEL    | 0.00688 | RCAN1   | 0.02244 |
| SHISAL1 | 3.00E-05 | PHLDA1  | 0.00692 | CC2D2A  | 0.02256 |
| CRYAB   | 4.00E-05 | ZDHHC15 | 0.00696 | NR0B2   | 0.02282 |
| BOC     | 6.00E-05 | PRR11   | 0.007   | SOX5    | 0.02307 |
| LAMA2   | 7.00E-05 | TSHZ3   | 0.00711 | CLDN24  | 0.02308 |
| PCARE   | 0.00011  | FAT4    | 0.0072  | MAMDC2  | 0.0236  |
| PID1    | 0.00014  | NRXN1   | 0.00723 | ARID5B  | 0.02362 |
| ABCC9   | 0.00015  | CAMK2A  | 0.00724 | FGFR1   | 0.02382 |

|           |          |          |         |          |         |
|-----------|----------|----------|---------|----------|---------|
| CASQ2     | 0.00017  | CYP1B1   | 0.00738 | HSPB2    | 0.02396 |
| HSPG2     | 0.00017  | TSPAN2   | 0.00745 | FBXO41   | 0.02406 |
| AOC3      | 0.00019  | INHBA    | 0.00749 | LRRK2    | 0.0242  |
| OSBPL10   | 0.00019  | PLEKHG4B | 0.00752 | MATN3    | 0.02463 |
| GHR       | 0.00019  | PLAC9    | 0.00763 | FAM43A   | 0.02488 |
| ADAMTSL3  | 2.00E-04 | ADGRD1   | 0.0079  | ZNF556   | 0.02497 |
| SORCS1    | 0.00021  | RASL12   | 0.00797 | PREX2    | 0.02498 |
| EPHB1     | 0.00022  | SLC3A1   | 0.00798 | SRPX     | 0.02502 |
| MAP1B     | 0.00026  | STON1    | 0.00799 | NT5DC4   | 0.02511 |
| MAP1A     | 0.00027  | FBN2     | 0.00799 | GAS7     | 0.02521 |
| NCAM1     | 0.00027  | DPF1     | 0.00802 | HIST2H3D | 0.02534 |
| SCN4B     | 0.00028  | NHSL2    | 0.00804 | HRG      | 0.02547 |
| HSPB7     | 3.00E-04 | SPRR2F   | 0.00806 | CNKSR2   | 0.02549 |
| WDR97     | 0.00031  | ITGB3    | 0.00812 | DHCR7    | 0.0255  |
| NEGR1     | 0.00033  | JPH3     | 0.00819 | PTGS1    | 0.0257  |
| FLNC      | 0.00034  | ATP2B4   | 0.00823 | IGSF9B   | 0.02578 |
| PDGFD     | 0.00034  | ATP6V1B1 | 0.00834 | EN1      | 0.02607 |
| DIXDC1    | 0.00035  | KRT38    | 0.00838 | NTRK3    | 0.0262  |
| GSN       | 0.00035  | PLPPR4   | 0.0084  | ZP4      | 0.02638 |
| LDLR      | 0.00037  | SGCB     | 0.00845 | SRL      | 0.02639 |
| SERPINB12 | 0.00039  | C17orf47 | 0.00854 | A1CF     | 0.02643 |
| TNS1      | 0.00042  | TCEAL2   | 0.00867 | IGF2BP2  | 0.02648 |
| SVIL      | 0.00042  | MAOB     | 0.0087  | ZFPM2    | 0.02653 |
| NPTX1     | 0.00044  | SAMD7    | 0.00878 | VSTM2L   | 0.02667 |
| OGN       | 0.00046  | MYH2     | 0.0088  | MFAP5    | 0.0268  |
| RBMS3     | 0.00048  | KCNS2    | 0.00884 | PROZ     | 0.02682 |
| S1PR1     | 0.00048  | KLF17    | 0.0089  | GYPC     | 0.02693 |
| TMOD1     | 5.00E-04 | AOX1     | 0.009   | TUBA8    | 0.02702 |
| PTGIS     | 0.00052  | TUB      | 0.00913 | KATNAL1  | 0.02703 |

|           |          |         |         |           |         |
|-----------|----------|---------|---------|-----------|---------|
| CPED1     | 0.00053  | ZBBX    | 0.00916 | NTNG1     | 0.0271  |
| DCHS1     | 0.00053  | SLC6A17 | 0.00917 | HCN3      | 0.02717 |
| SYNC      | 0.00055  | FAM129A | 0.00927 | GPC2      | 0.02726 |
| MXRA7     | 0.00057  | THSD4   | 0.00933 | JAM2      | 0.02755 |
| SCN7A     | 0.00057  | MUC19   | 0.00933 | KRTAP19-1 | 0.02765 |
| KIAA1210  | 0.00058  | WDR17   | 0.00937 | PLN       | 0.02779 |
| DOK6      | 0.00061  | LSM11   | 0.0094  | FZD7      | 0.0278  |
| STRC      | 0.00061  | RBM24   | 0.00948 | FGF2      | 0.02815 |
| ADAMTS12  | 0.00062  | FAM124A | 0.0095  | NTF3      | 0.0282  |
| CCDC80    | 0.00065  | ANGPTL1 | 0.00974 | FAM57B    | 0.02831 |
| PCSK9     | 0.00066  | GAD1    | 0.00978 | DNAH11    | 0.02832 |
| SETBP1    | 0.00068  | ACTC1   | 0.00979 | ZFP42     | 0.02852 |
| SPON1     | 0.00069  | F10     | 0.00981 | ARMC4     | 0.02855 |
| TENM2     | 7.00E-04 | CFL2    | 0.00987 | PDE4B     | 0.02861 |
| ITGA7     | 0.00072  | PCDHB8  | 0.00996 | EPHB2     | 0.02861 |
| POU5F1    | 0.00073  | CAVIN2  | 0.01009 | OLFM4     | 0.02871 |
| SLC24A3   | 0.00076  | ABI3BP  | 0.01011 | FBLN5     | 0.02914 |
| ADCYAP1R1 | 8.00E-04 | TTL7    | 0.01013 | MGLL      | 0.02919 |
| HYAL4     | 0.00082  | ZMAT4   | 0.01013 | PAQR4     | 0.02922 |
| TNFAIP8L3 | 0.00083  | EGR3    | 0.0103  | KCNN3     | 0.02934 |
| TMPRSS6   | 0.00083  | DAAM2   | 0.01035 | TBX5      | 0.02943 |
| MFAP4     | 0.00085  | NFATC1  | 0.01035 | BUB1B     | 0.0296  |
| GULP1     | 0.00086  | PRSS56  | 0.01035 | OTOG      | 0.02977 |
| TCEAL5    | 0.00086  | MTHFD1L | 0.01038 | BAG2      | 0.03014 |
| TGFB11I   | 0.00087  | ZPLD1   | 0.01039 | CAMKV     | 0.03048 |
| TCHH      | 9.00E-04 | PDE1C   | 0.0104  | C7        | 0.03084 |
| ECM1      | 0.00095  | BDNF    | 0.01042 | LMOD1     | 0.03089 |
| RASSF3    | 0.00096  | GALNT15 | 0.01052 | OR2I1P    | 0.03092 |
| ITIH2     | 0.00096  | CLEC12B | 0.01052 | TRIM71    | 0.03096 |

|         |         |          |         |           |         |
|---------|---------|----------|---------|-----------|---------|
| MSRB3   | 0.001   | SNED1    | 0.01054 | PCDH20    | 0.03118 |
| PRKG1   | 0.00103 | OLFML3   | 0.01058 | TRPC3     | 0.03131 |
| RHOJ    | 0.00103 | STRA8    | 0.01062 | PDZRN3    | 0.03132 |
| YDJC    | 0.00106 | CDON     | 0.01063 | TRIML2    | 0.03145 |
| HOXB5   | 0.00112 | AMOTL1   | 0.01065 | CST4      | 0.03155 |
| PRPH    | 0.00118 | DUSP2    | 0.0108  | SYNM      | 0.03188 |
| SYNPO2  | 0.00122 | MAP3K20  | 0.01086 | HS3ST3A1  | 0.03194 |
| BHMT2   | 0.00129 | CDKL1    | 0.01086 | SOBP      | 0.03247 |
| PRELP   | 0.00129 | CACNA1I  | 0.01087 | F2        | 0.03268 |
| DGKB    | 0.00135 | HES2     | 0.01104 | ADCYAP1   | 0.03288 |
| SPARCL1 | 0.0014  | SYPL2    | 0.0111  | RAMP1     | 0.03289 |
| KCNB1   | 0.00141 | PDE1A    | 0.01115 | SCNN1G    | 0.03296 |
| UNC5C   | 0.00143 | PTPRD    | 0.01123 | AKT3      | 0.03307 |
| PLA2G2F | 0.00143 | TMEM255A | 0.01129 | SH2D6     | 0.03313 |
| LRFN2   | 0.00146 | LRRN4    | 0.01145 | PCDH9     | 0.0333  |
| RS1     | 0.00146 | HGFAC    | 0.01149 | MUC16     | 0.03336 |
| CTSV    | 0.00151 | NEXMIF   | 0.01153 | EDNRA     | 0.0334  |
| GALNT16 | 0.00153 | DAPL1    | 0.01156 | SLMAP     | 0.03343 |
| FAM110B | 0.00155 | CPEB2    | 0.01157 | DNAJB5    | 0.03343 |
| RBBP8NL | 0.00156 | KCNQ5    | 0.01163 | PTGFR     | 0.03354 |
| INSYN1  | 0.00161 | TRIB3    | 0.01164 | TMPRSS11E | 0.03372 |
| REEP1   | 0.00165 | SPEG     | 0.01167 | CDKN3     | 0.03381 |
| IGSF10  | 0.00169 | ADRA1D   | 0.01172 | FBN1      | 0.03395 |
| DCHS2   | 0.00169 | PDE5A    | 0.01188 | ALPG      | 0.03407 |
| VSTM4   | 0.0017  | RAB23    | 0.01191 | COLEC12   | 0.03411 |
| JAM3    | 0.00171 | TXLNB    | 0.01194 | GPIHBP1   | 0.03413 |
| GEM     | 0.00175 | RPTN     | 0.01202 | ANXA6     | 0.03426 |
| C2orf40 | 0.00178 | CSRP1    | 0.01221 | ADCY5     | 0.0343  |
| COL14A1 | 0.00178 | SCG2     | 0.01224 | ZIC2      | 0.03436 |

|          |         |           |         |         |         |
|----------|---------|-----------|---------|---------|---------|
| CACNA2D1 | 0.00179 | MYL3      | 0.01234 | VCL     | 0.03443 |
| NFIA     | 0.00181 | MYH11     | 0.01243 | ASXL3   | 0.03446 |
| NEURL3   | 0.00182 | ZFHX4     | 0.01244 | DMD     | 0.03485 |
| MEOX2    | 0.00188 | GPR135    | 0.01261 | SHISA3  | 0.03495 |
| MEIOB    | 0.0019  | FAM163B   | 0.01262 | TMEM45A | 0.03502 |
| LHFPL6   | 0.00194 | SPANXD    | 0.01265 | TTC23L  | 0.03504 |
| CRTAC1   | 0.00194 | LATS2     | 0.01279 | MCAM    | 0.03518 |
| MYC      | 0.00195 | SLC39A5   | 0.01287 | MLIP    | 0.0355  |
| HAVCR1   | 0.00204 | TAGLN     | 0.01291 | KRT4    | 0.03559 |
| AIFM3    | 0.00204 | SCN3B     | 0.01292 | SORBS1  | 0.03566 |
| ENKUR    | 0.00208 | RGS22     | 0.01296 | SMPDL3B | 0.03569 |
| PTGER3   | 0.00215 | EPGN      | 0.01309 | JAZF1   | 0.0357  |
| CSPG4    | 0.00221 | OTOF      | 0.0131  | FGFBP1  | 0.03572 |
| PTPRR    | 0.00221 | CAP2      | 0.01321 | CDC20   | 0.03573 |
| FGF10    | 0.00226 | BOLA2B    | 0.01358 | FASN    | 0.03576 |
| VSIG1    | 0.00233 | RYR2      | 0.01369 | PPM1N   | 0.03599 |
| TM4SF19  | 0.00242 | GNG11     | 0.01371 | CNRIP1  | 0.03614 |
| PRSS35   | 0.00243 | CKMT2     | 0.01388 | LBX2    | 0.03617 |
| SH3GL3   | 0.00243 | RUNX1T1   | 0.01388 | ITGA1   | 0.0362  |
| RAD54B   | 0.00246 | TMPRSS11F | 0.01388 | FBXL7   | 0.03623 |
| CALD1    | 0.00247 | EPS8L3    | 0.01389 | PM20D1  | 0.03623 |
| TMEM132A | 0.00249 | EDNRB     | 0.01399 | MYH7B   | 0.03624 |
| BCHE     | 0.00252 | PSD2      | 0.01401 | KIF12   | 0.03637 |
| KANK4    | 0.00263 | NRXN2     | 0.01423 | STARD9  | 0.0366  |
| SERPINB2 | 0.00268 | SLC23A3   | 0.01434 | CLEC3B  | 0.0368  |
| PDLIM3   | 0.00282 | ARID3C    | 0.01447 | LCN12   | 0.03714 |
| FHL1     | 0.00285 | CYP4F8    | 0.0146  | MRVI1   | 0.03731 |
| ZGRF1    | 0.00287 | PRSS41    | 0.01467 | UGT2A3  | 0.03746 |
| GARNL3   | 0.00289 | SHISA6    | 0.01468 | HDAC4   | 0.03775 |



|         |         |          |         |          |         |
|---------|---------|----------|---------|----------|---------|
| TPM1    | 0.0029  | CPEB1    | 0.0147  | RLN2     | 0.03782 |
| SLIT2   | 0.00294 | FGF11    | 0.01475 | SSC4D    | 0.03789 |
| MYLK    | 0.00295 | CTGF     | 0.0149  | MSH5     | 0.03799 |
| CPXM2   | 0.00297 | EPHA6    | 0.01512 | OMD      | 0.03813 |
| TOX3    | 0.00297 | C12orf75 | 0.01514 | ACTA2    | 0.03822 |
| SGCD    | 0.00298 | SCRG1    | 0.01536 | PITX1    | 0.03859 |
| PBOV1   | 0.003   | RSPO3    | 0.01539 | RRM2     | 0.0386  |
| DPYSL2  | 0.00301 | FSTL5    | 0.0154  | SIM2     | 0.03871 |
| FAM180A | 0.00304 | MAGEE2   | 0.01544 | JUN      | 0.03898 |
| SAPCD1  | 0.00306 | TMEM229A | 0.01562 | SMC1B    | 0.03905 |
| ADCY2   | 0.00312 | LCE1F    | 0.01565 | CYP2C9   | 0.03915 |
| RHBG    | 0.00312 | DPYSL3   | 0.01574 | CRISPLD2 | 0.03944 |
| COMP    | 0.0032  | CYP3A7   | 0.01576 | FOXP2    | 0.03962 |
| SPAG4   | 0.00331 | PLXNA4   | 0.01577 | FILIP1   | 0.03983 |
| NUDT10  | 0.00334 | PTHLH    | 0.01583 | SLC23A1  | 0.04005 |
| MEPE    | 0.00339 | ADRB3    | 0.01597 | NAV3     | 0.04011 |
| PDGFRA  | 0.00346 | CDH19    | 0.01612 | CYS1     | 0.04027 |
| SLC2A6  | 0.0035  | ABCA4    | 0.01612 | TRIM63   | 0.04056 |
| RGS2    | 0.00354 | GPAT3    | 0.01613 | METTL24  | 0.04059 |
| SCN2B   | 0.00355 | PODNL1   | 0.01618 | ZEB1     | 0.0408  |
| PCDH18  | 0.00363 | CXCL12   | 0.01623 | TMEM191C | 0.0409  |
| PDZD3   | 0.00363 | PPARGC1A | 0.01636 | PRSS50   | 0.04169 |
| CYTL1   | 0.00365 | BTG2     | 0.01648 | TPSD1    | 0.0422  |
| MUC22   | 0.00367 | SRD5A2   | 0.01662 | KCND3    | 0.04224 |
| PPFIA2  | 0.00374 | CLIC4    | 0.01668 | TMEM108  | 0.04241 |
| LDB2    | 0.00379 | CSRNP3   | 0.0167  | ABCA8    | 0.04245 |
| PALLD   | 0.00382 | PSAPL1   | 0.0167  | C1QL4    | 0.04262 |
| LIME1   | 0.00383 | CSDC2    | 0.01672 | ANKRD29  | 0.04269 |
| WWTR1   | 0.00384 | NKX6-2   | 0.01674 | LBX1     | 0.04271 |

|          |         |          |         |         |         |
|----------|---------|----------|---------|---------|---------|
| ADRA2A   | 0.00384 | HIST1H4C | 0.01674 | SLC30A3 | 0.04278 |
| ZNF432   | 0.00384 | SEMA3A   | 0.01693 | RERG    | 0.04287 |
| CNTN1    | 0.00394 | TMEM35A  | 0.01707 | CST1    | 0.04288 |
| FXVD6    | 0.00404 | KCNJ8    | 0.01731 | DES     | 0.04297 |
| P3H4     | 0.00406 | MAPRE2   | 0.01738 | PKHD1L1 | 0.04304 |
| TRPM2    | 0.00429 | PENK     | 0.01751 | SAPCD2  | 0.04305 |
| SHD      | 0.0043  | EML1     | 0.01756 | CHAT    | 0.04308 |
| CTSG     | 0.00432 | IGFBP5   | 0.01781 | BVES    | 0.04375 |
| SGK2     | 0.00435 | PGR      | 0.0179  | THBS1   | 0.04378 |
| NRP2     | 0.00449 | GUCA1C   | 0.0179  | RSPO2   | 0.04382 |
| C8orf88  | 0.00452 | IGDCC4   | 0.01791 | CRYBA2  | 0.04388 |
| METTL11B | 0.00457 | TMEM132C | 0.01792 | CDCA2   | 0.04408 |
| FBXO32   | 0.00461 | AGTR1    | 0.01793 | TRIML1  | 0.0441  |
| CCIN     | 0.00461 | NOVA1    | 0.01796 | HDGFL1  | 0.04424 |
| ADAMTS16 | 0.00462 | ADAMTS9  | 0.01811 | HAND2   | 0.04431 |
| SLC5A11  | 0.00465 | HEPH     | 0.01813 | KCNE4   | 0.04454 |
| MYADM    | 0.00489 | TGFBR3L  | 0.01823 | SUMO4   | 0.04458 |
| IL1RAPL1 | 0.00498 | FOXD1    | 0.01844 | TRPC4   | 0.04462 |
| HSD3B1   | 0.00503 | OLFML1   | 0.01848 | ROR2    | 0.04477 |
| CHRD1    | 0.00508 | TNN      | 0.01866 | GABRA2  | 0.04494 |
| KCNMA1   | 0.00513 | PRRG3    | 0.01868 | TCEAL7  | 0.04517 |
| FAIM2    | 0.00515 | SLC22A3  | 0.0187  | SLX1B   | 0.04565 |
| TMEM100  | 0.00539 | MALL     | 0.01878 | EGR1    | 0.04568 |
| SPTA1    | 0.0054  | TFAP2B   | 0.01888 | PEG3    | 0.04569 |
| EBF1     | 0.00544 | SFRP2    | 0.019   | C4orf48 | 0.04617 |
| SMOC2    | 0.00549 | LRFN5    | 0.01905 | GATA6   | 0.0463  |
| DDR2     | 0.00556 | S100A7A  | 0.01924 | EPHA3   | 0.04658 |
| PLSCR4   | 0.00559 | ADGRA2   | 0.01939 | UCN2    | 0.0466  |
| CTSE     | 0.00559 | AARD     | 0.0194  | GPC6    | 0.04672 |

|           |         |          |         |          |         |
|-----------|---------|----------|---------|----------|---------|
| DSTN      | 0.00563 | PCP2     | 0.01942 | RSPO1    | 0.04674 |
| OR7A5     | 0.00565 | DTNA     | 0.01947 | DMRT1    | 0.04696 |
| FILIP1L   | 0.00569 | PILRB    | 0.01954 | GALNT17  | 0.04702 |
| FHL5      | 0.00572 | SCX      | 0.01962 | DACT3    | 0.04736 |
| FERMT2    | 0.00573 | HSPA12A  | 0.01978 | SPRR3    | 0.04752 |
| PDZRN4    | 0.00583 | CNN1     | 0.02002 | SLC12A8  | 0.04773 |
| EGR2      | 0.00585 | HIST1H1C | 0.02008 | SLC18A3  | 0.04775 |
| ARHGAP24  | 0.00592 | SFRP1    | 0.02012 | MMP9     | 0.04792 |
| PLIN4     | 0.00592 | COL21A1  | 0.02019 | MYOCD    | 0.04816 |
| NAP1L3    | 0.00595 | DNASE1L2 | 0.0207  | TRIB1    | 0.04836 |
| NFE4      | 0.00603 | SVEP1    | 0.02075 | HMMR     | 0.04849 |
| CCNB1     | 0.00606 | PDE2A    | 0.02077 | KLF4     | 0.04863 |
| ANGPTL5   | 0.0061  | FGF7     | 0.02097 | STEAP1B  | 0.04875 |
| BECN2     | 0.00612 | PPEF1    | 0.02115 | AKNAD1   | 0.04903 |
| TBX1      | 0.00618 | STXBP6   | 0.02121 | CRHBP    | 0.04917 |
| HIST1H3F  | 0.00625 | KPNA2    | 0.02146 | ARHGAP20 | 0.04918 |
| NT5DC3    | 0.0063  | A2M      | 0.02154 | ADGRB3   | 0.04945 |
| PMP2      | 0.00632 | NFIL3    | 0.02169 | ARHGEF25 | 0.04959 |
| CDC42BPA  | 0.00635 | TRIM55   | 0.02174 | TPSAB1   | 0.04968 |
| NAT8      | 0.00635 | CMA1     | 0.02183 | ACTL6B   | 0.04974 |
| PLK1      | 0.00647 | SAMD15   | 0.02186 | RNFT2    | 0.04976 |
| INSL6     | 0.00649 | DCN      | 0.02192 | HS3ST1   | 0.04993 |
| C20orf204 | 0.00651 | NXPH4    | 0.02205 | CPA6     | 0.04999 |
| AKAP6     | 0.0066  |          |         |          |         |

Table S4-All lncRNAs related to bladder cancer survival in the three-layer network.

| id          | pvalue   | id    | pvalue | id         | pvalue  |
|-------------|----------|-------|--------|------------|---------|
| ADAMTS9-AS1 | 2.00E-05 | TTY16 | 0.007  | AC079313.2 | 0.02675 |

|             |          |            |         |            |         |
|-------------|----------|------------|---------|------------|---------|
| ADAMTS9-AS2 | 9.00E-05 | MYO16-AS1  | 0.00704 | AC012494.1 | 0.02688 |
| AC108025.2  | 0.00041  | AC110491.1 | 0.00717 | AC011510.1 | 0.0274  |
| WASIR2      | 0.00069  | AC112721.1 | 0.00808 | AL139002.1 | 0.02748 |
| HCG22       | 0.00138  | AC005150.1 | 0.00929 | AC009060.1 | 0.0297  |
| UBE2Q1-AS1  | 0.0016   | LINC00351  | 0.0095  | MAGI2-AS3  | 0.0301  |
| AL355102.1  | 0.00211  | PSORS1C3   | 0.01226 | AC092811.1 | 0.03183 |
| AC053503.4  | 0.00258  | FLJ36000   | 0.01689 | SMC2-AS1   | 0.03184 |
| AC078778.1  | 0.00387  | C7orf65    | 0.01817 | MIR137HG   | 0.03218 |
| SACS-AS1    | 0.0048   | SOX2-OT    | 0.01911 | AC005180.1 | 0.03906 |
| LINC00536   | 0.00518  | AC107959.1 | 0.01937 | AC016745.1 | 0.04253 |
| AC016773.1  | 0.00544  | LINC00460  | 0.02196 | AC127496.3 | 0.04777 |
| TTY16       | 0.007    | AC002398.2 | 0.02641 | AC025431.1 | 0.04792 |

Table S5-All miRNAs related to bladder cancer survival in the three-layer network.

| id           | pvalue  | id           | pvalue  | id           | pvalue  |
|--------------|---------|--------------|---------|--------------|---------|
| hsa-mir-216a | 0.00022 | hsa-mir-133b | 0.00762 | hsa-mir-192  | 0.01846 |
| hsa-let-7c   | 0.00293 | hsa-mir-145  | 0.01139 | hsa-mir-425  | 0.03339 |
| hsa-mir-200c | 0.00302 | hsa-mir-93   | 0.01348 | hsa-mir-449b | 0.03815 |
| hsa-mir-33a  | 0.00632 | hsa-mir-217  | 0.01663 | hsa-mir-200b | 0.04014 |
| hsa-mir-143  | 0.00707 | hsa-mir-33b  | 0.01816 | hsa-mir-195  | 0.04673 |

Table S6-All mRNAs related to bladder cancer survival in the three-layer network.

| id    | pvalue   | id     | pvalue  | id     | pvalue  |
|-------|----------|--------|---------|--------|---------|
| HSPB6 | 1.00E-05 | CFL2   | 0.00987 | FAM57B | 0.02831 |
| MAP1B | 0.00026  | DAAM2  | 0.01035 | KCNN3  | 0.02934 |
| NCAM1 | 0.00027  | PRSS56 | 0.01035 | CAMKV  | 0.03048 |
| PDGFD | 0.00034  | BDNF   | 0.01042 | LMOD1  | 0.03089 |

|         |         |         |         |         |         |
|---------|---------|---------|---------|---------|---------|
| LDLR    | 0.00037 | AMOTL1  | 0.01065 | TRIM71  | 0.03096 |
| NPTX1   | 0.00044 | DUSP2   | 0.0108  | TRPC3   | 0.03131 |
| HOXB5   | 0.00112 | PTPRD   | 0.01123 | SYNM    | 0.03188 |
| SYNPO2  | 0.00122 | CPEB2   | 0.01157 | AKT3    | 0.03307 |
| RS1     | 0.00146 | TRIB3   | 0.01164 | SLMAP   | 0.03343 |
| NFIA    | 0.00181 | RAB23   | 0.01191 | VCL     | 0.03443 |
| MEOX2   | 0.00188 | MYH11   | 0.01243 | SORBS1  | 0.03566 |
| AIFM3   | 0.00204 | ZFHX4   | 0.01244 | JAZF1   | 0.0357  |
| FGF10   | 0.00226 | LATS2   | 0.01279 | FASN    | 0.03576 |
| CALD1   | 0.00247 | RUNX1T1 | 0.01388 | FBXL7   | 0.03623 |
| PBOV1   | 0.003   | SHISA6  | 0.01468 | MYH7B   | 0.03624 |
| DPYSL2  | 0.00301 | CTGF    | 0.0149  | LCN12   | 0.03714 |
| PDGFRA  | 0.00346 | BTG2    | 0.01648 | RRM2    | 0.0386  |
| CHRD1   | 0.00508 | IGFBP5  | 0.01781 | JUN     | 0.03898 |
| TMEM100 | 0.00539 | IGDCC4  | 0.01791 | ZEB1    | 0.0408  |
| EBF1    | 0.00544 | FOXD1   | 0.01844 | ANKRD29 | 0.04269 |
| EGR2    | 0.00585 | CNN1    | 0.02002 | SLC30A3 | 0.04278 |
| CCNB1   | 0.00606 | KPNA2   | 0.02146 | DES     | 0.04297 |
| PMP2    | 0.00632 | ARID5B  | 0.02362 | THBS1   | 0.04378 |
| E2F8    | 0.00665 | LRRK2   | 0.0242  | TCEAL7  | 0.04517 |
| ITGB3   | 0.00812 | IGF2BP2 | 0.02648 | MMP9    | 0.04792 |
| ATP2B4  | 0.00823 | ZFPM2   | 0.02653 | TRIB1   | 0.04836 |
| FAM129A | 0.00927 | KATNAL1 | 0.02703 | KLF4    | 0.04863 |
| LSM11   | 0.0094  | FZD7    | 0.0278  | AKNAD1  | 0.04903 |
| RBM24   | 0.00948 | FGF2    | 0.02815 | CRHBP   | 0.04917 |
| ACTC1   | 0.00979 | NTF3    | 0.0282  | ACTL6B  | 0.04974 |

Figure S1-K-M curve analysis of survival-related mRNAs and lncRNAs in the subnetworks.

survival curve (p=0.00544)

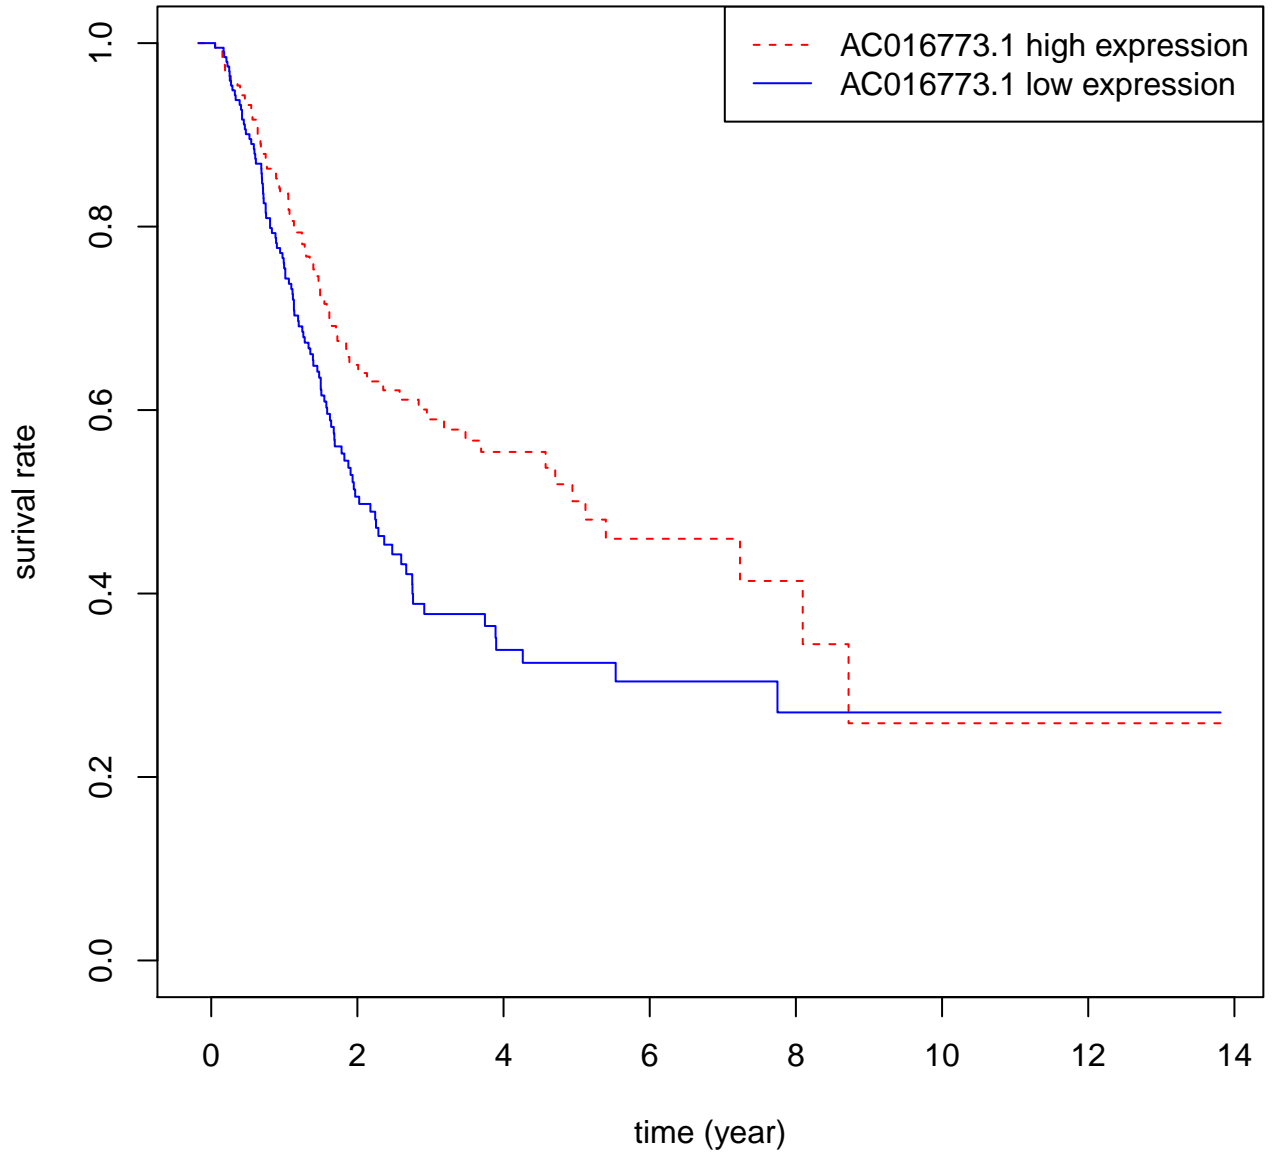

survival curve (p=0.00808)

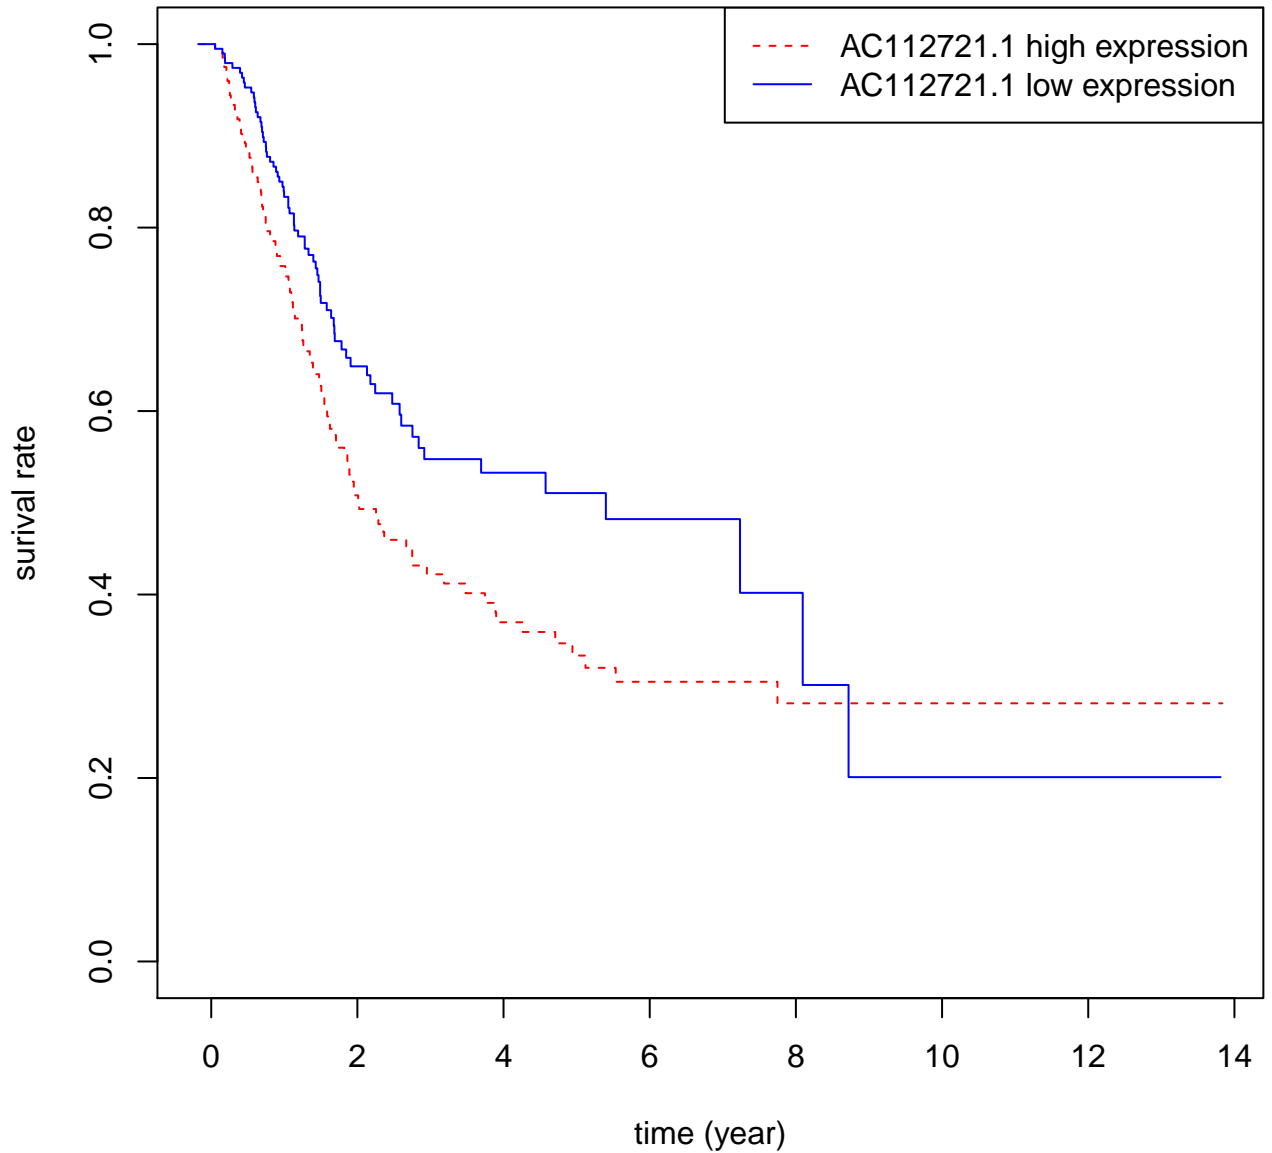

survival curve (p=0.04777)

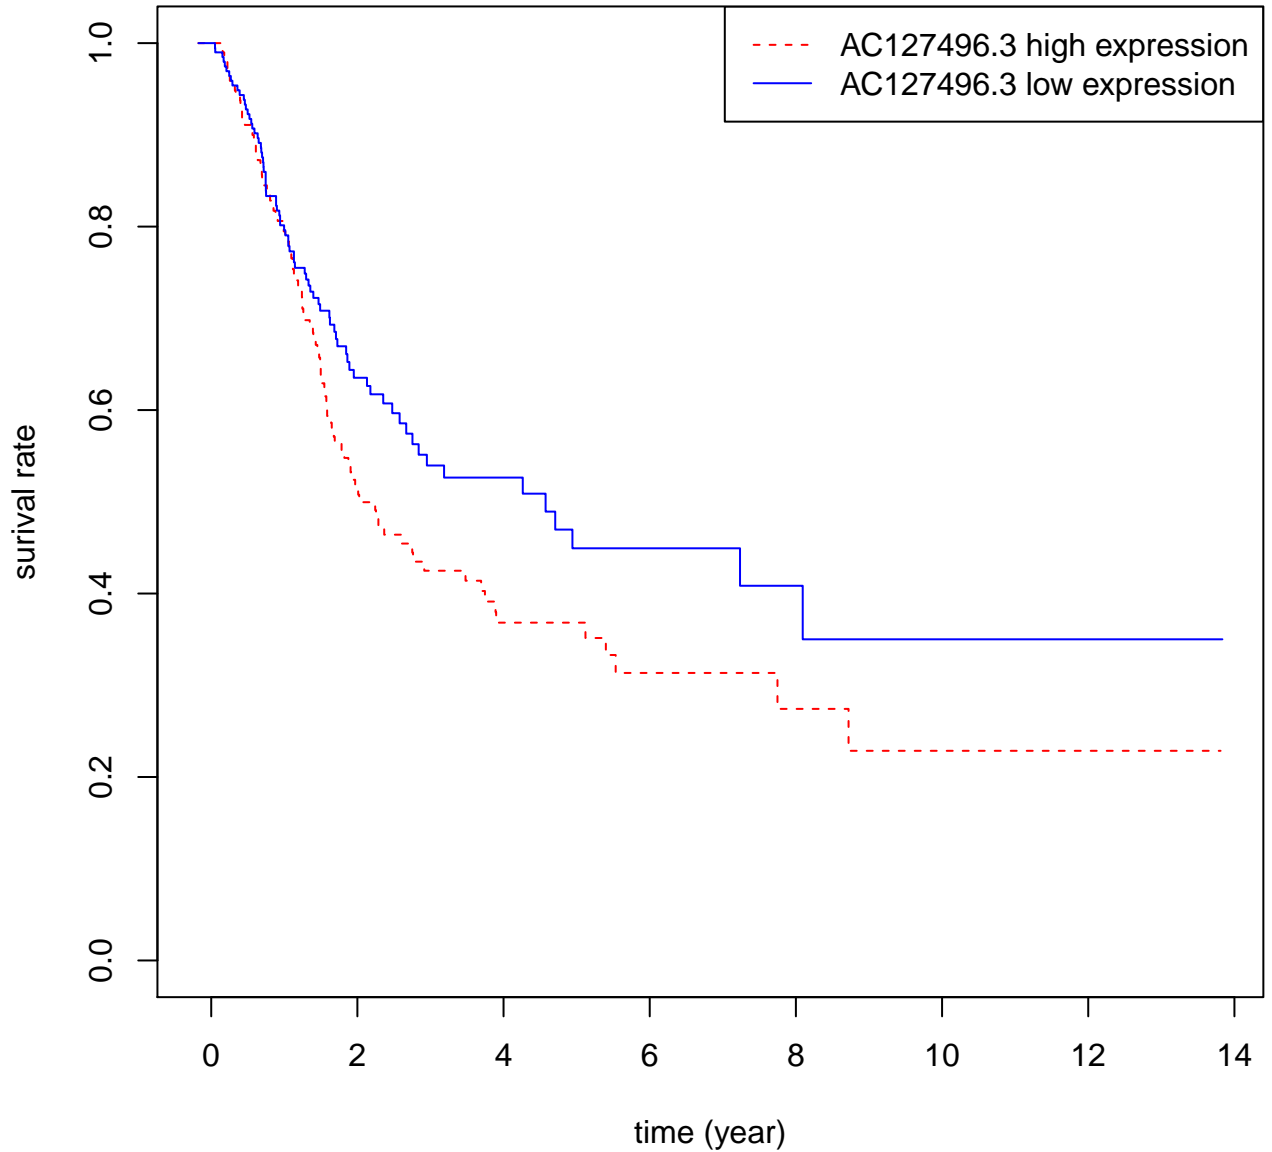



survival curve (p=9e-05)

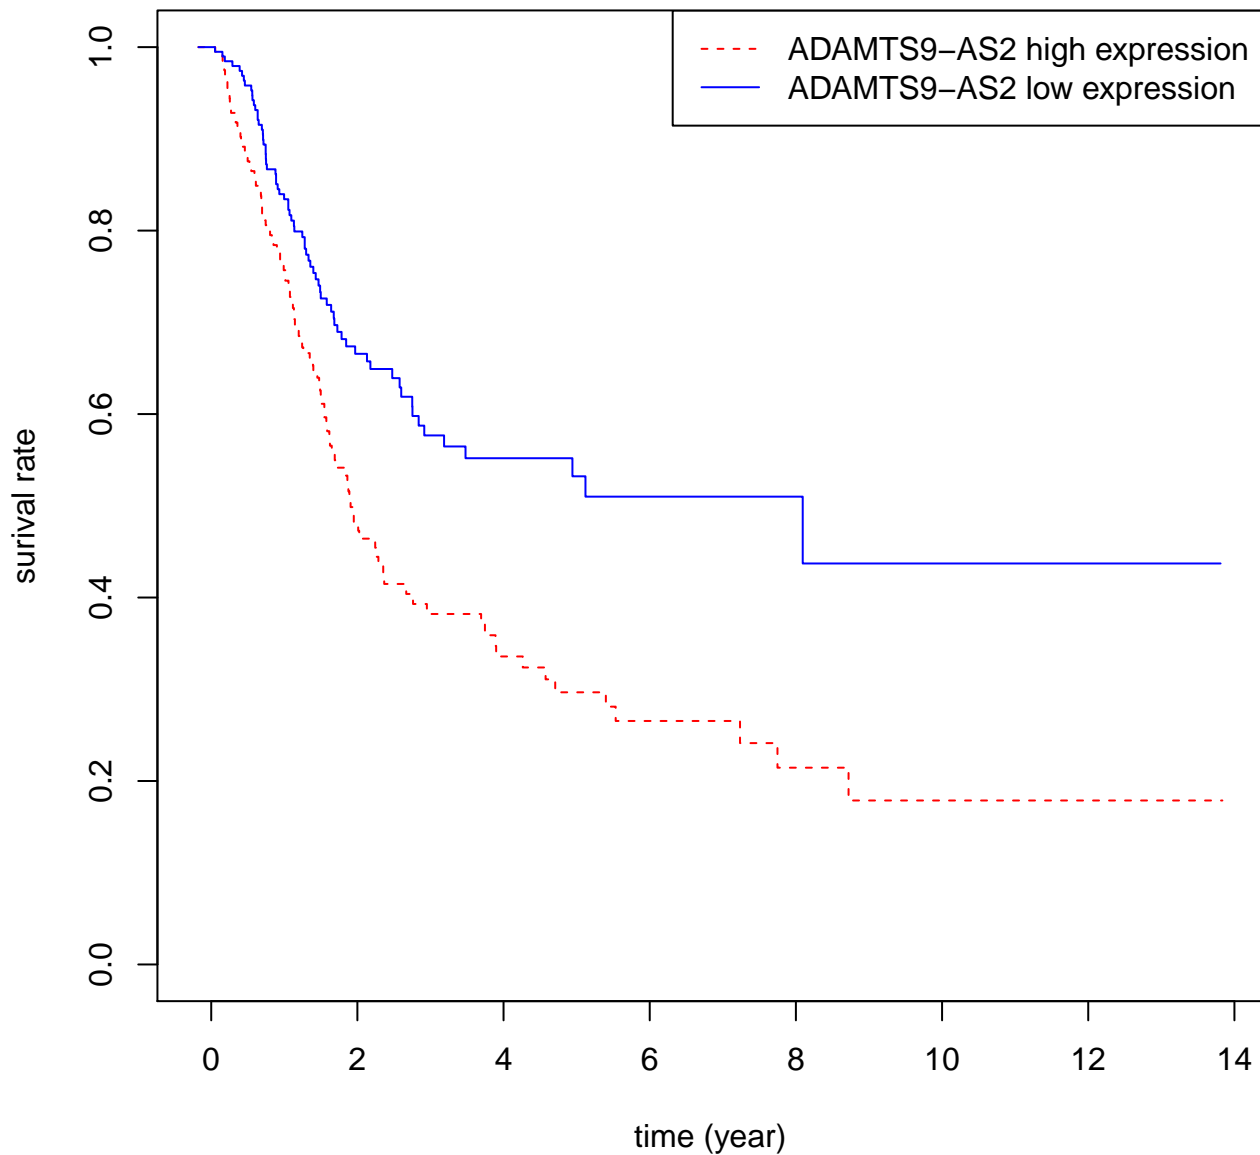

survival curve (p=0.01817)

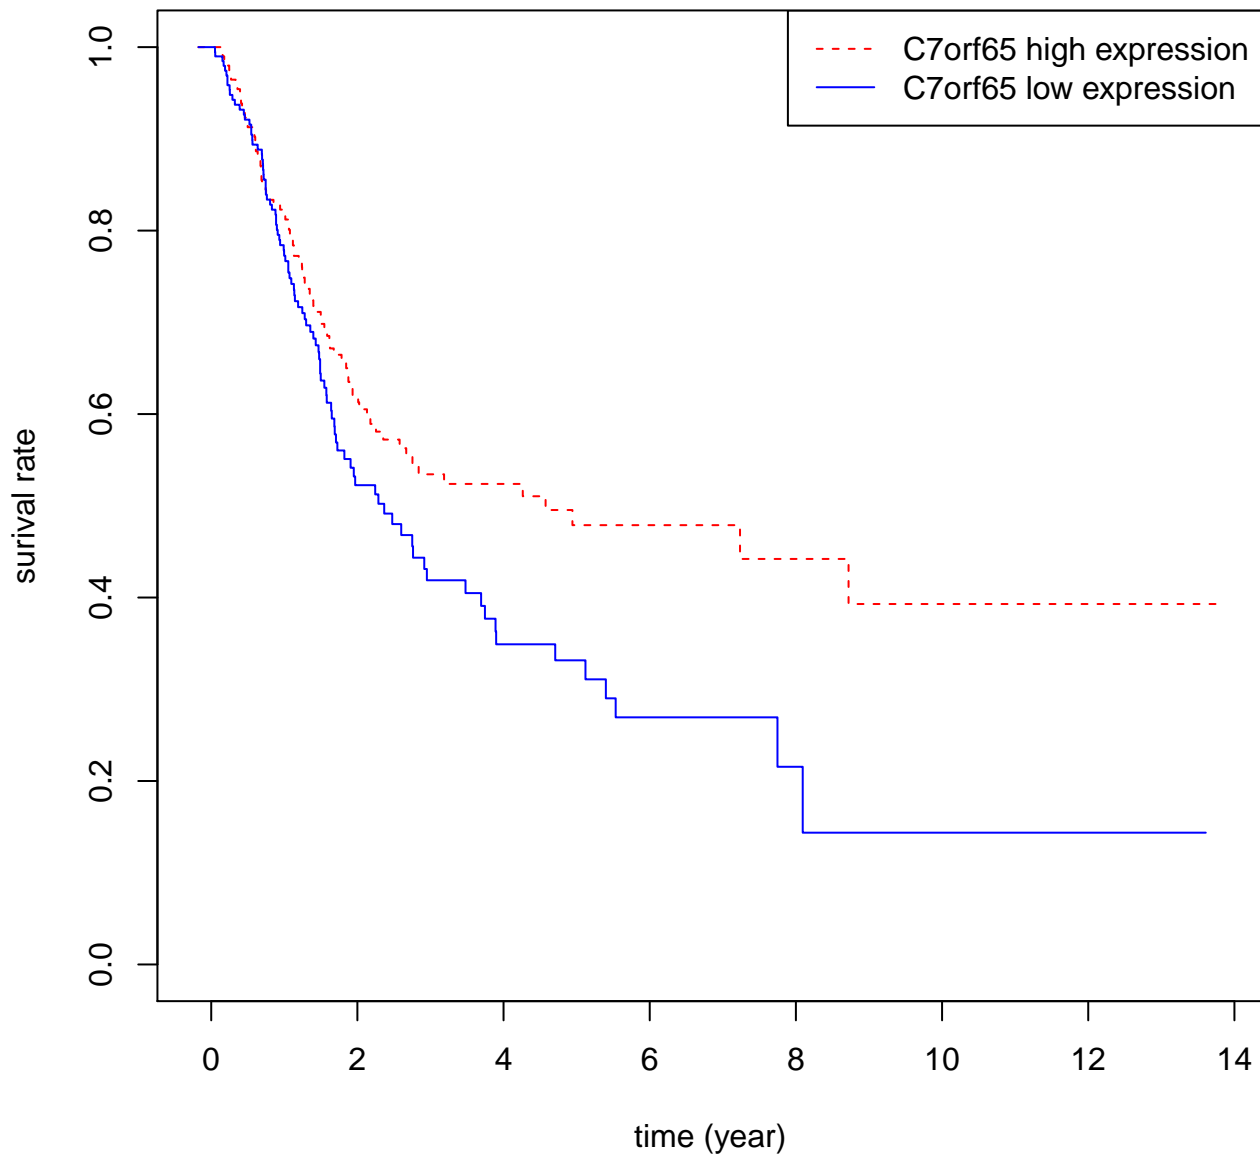

survival curve (p=0.00138)

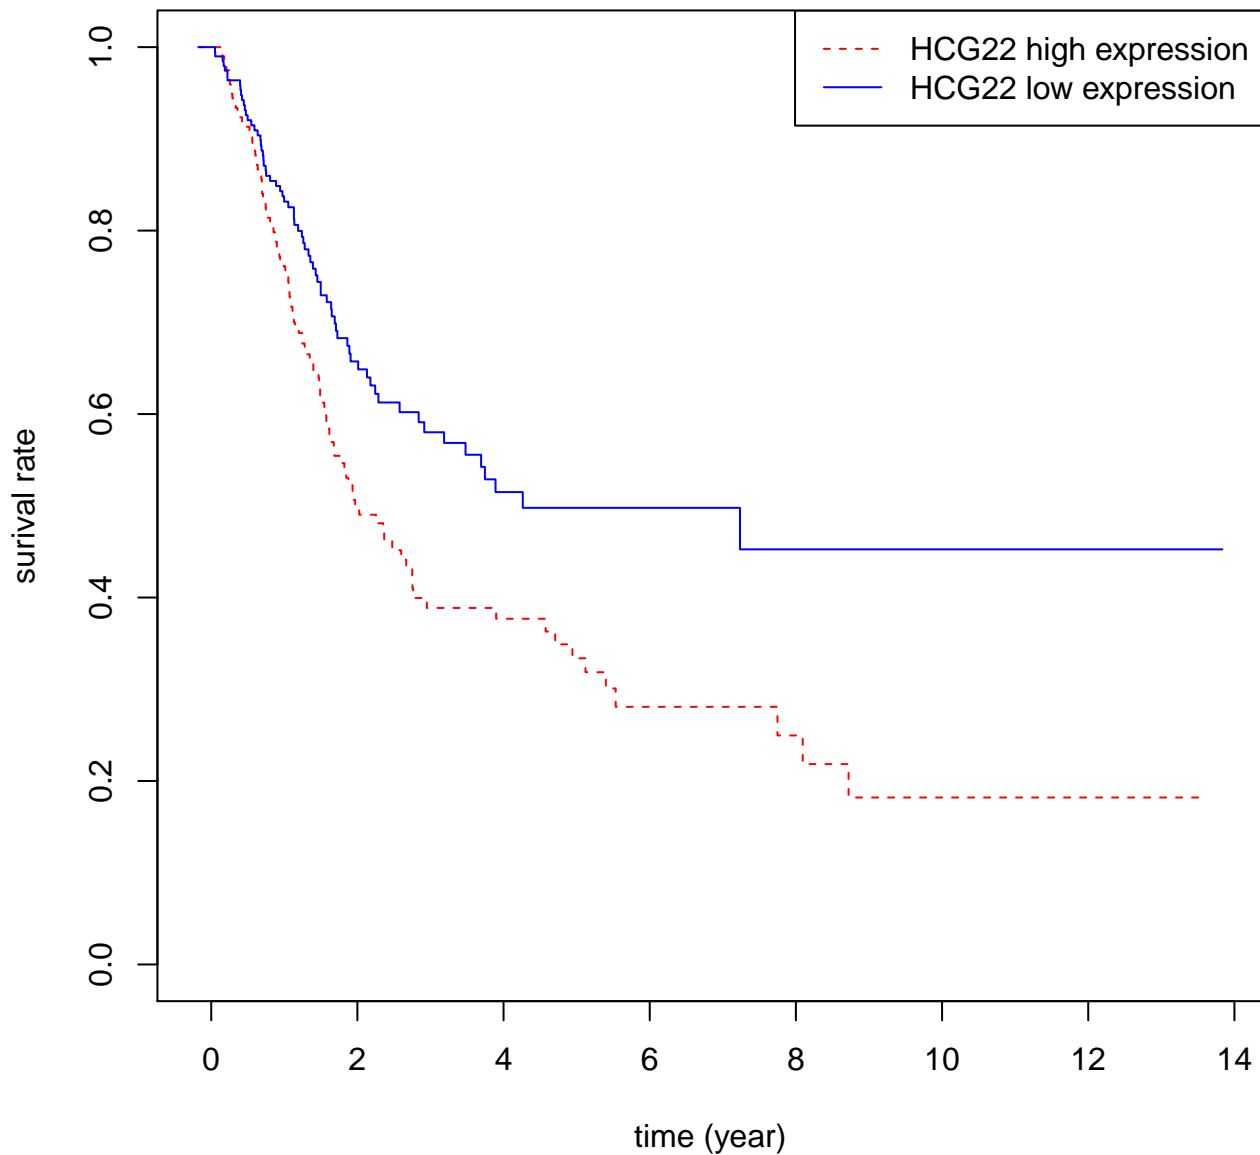

survival curve (p=0.00518)

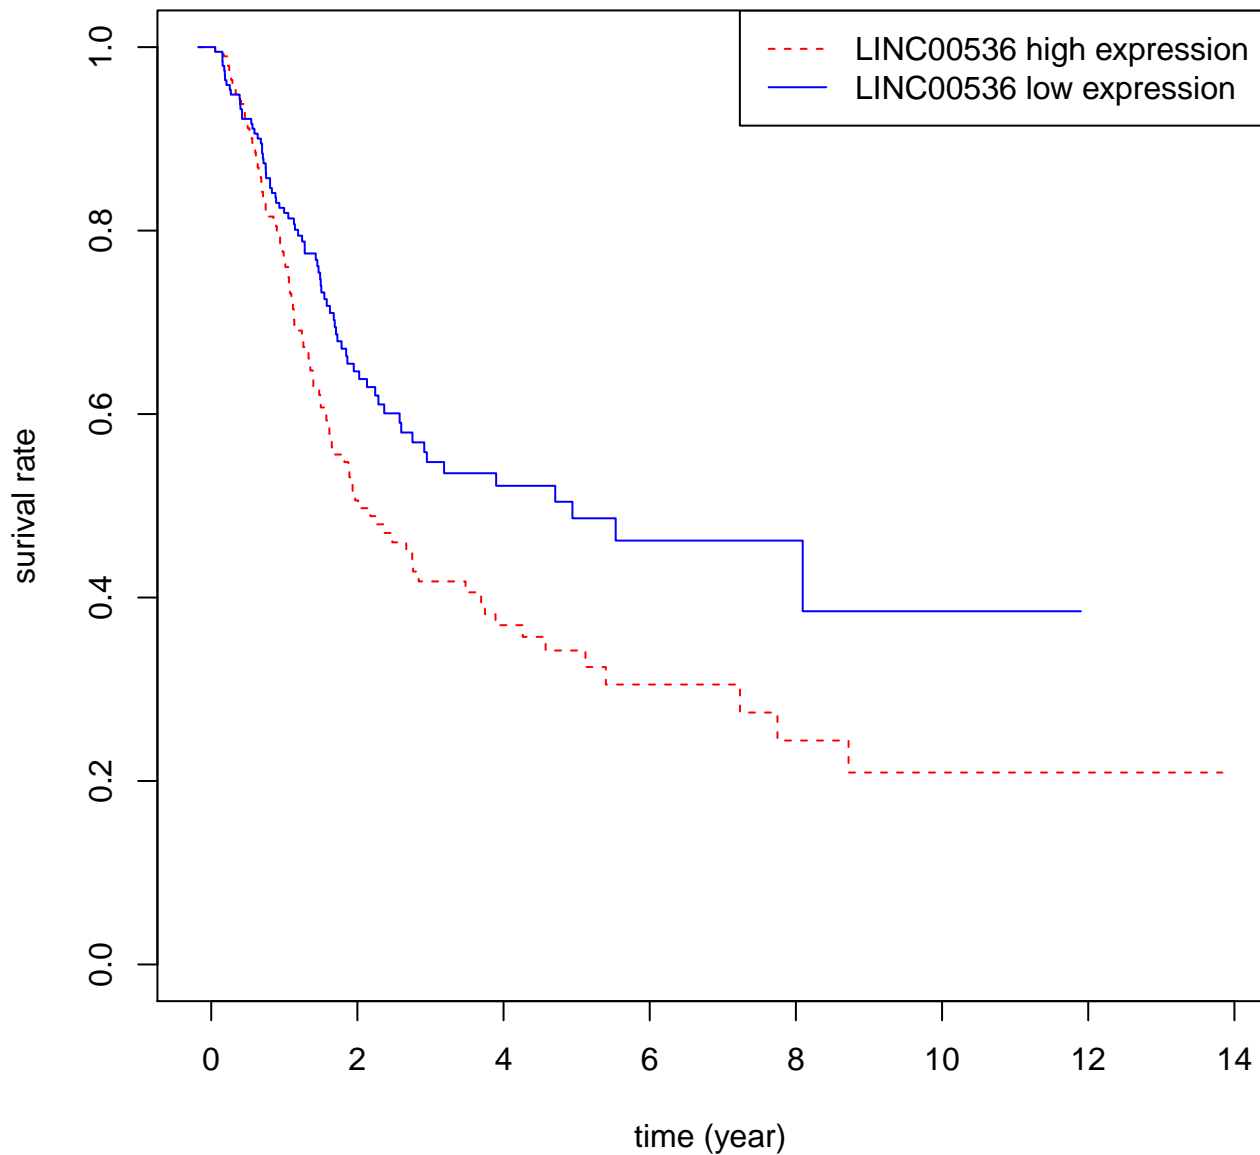

survival curve (p=0.0301)

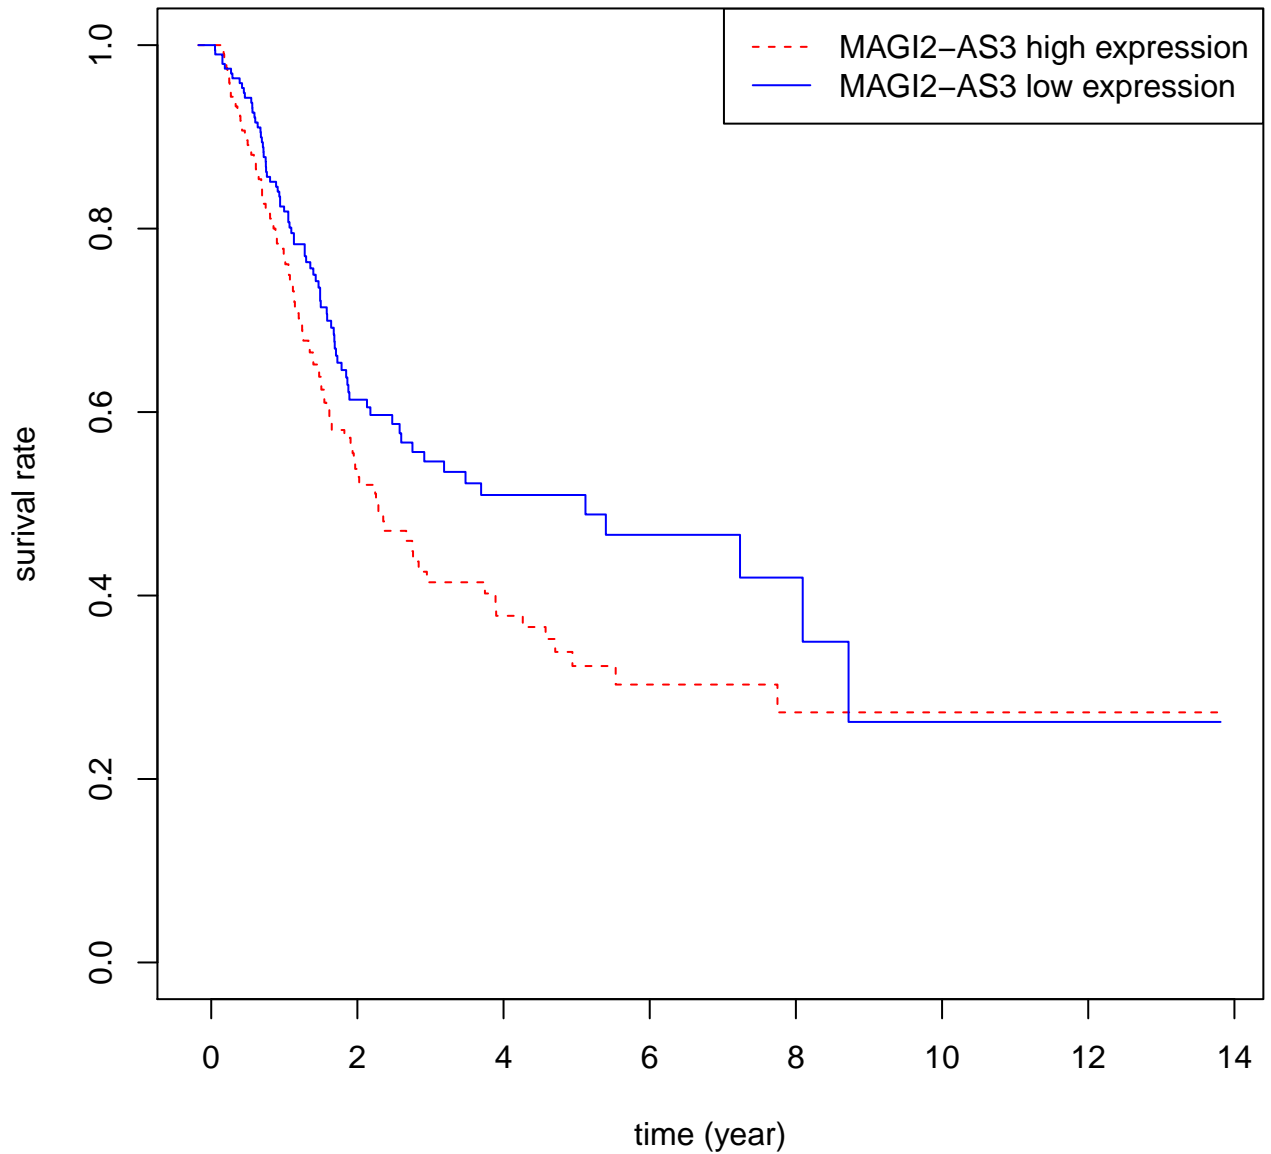

**survival curve (p=0.0048)**

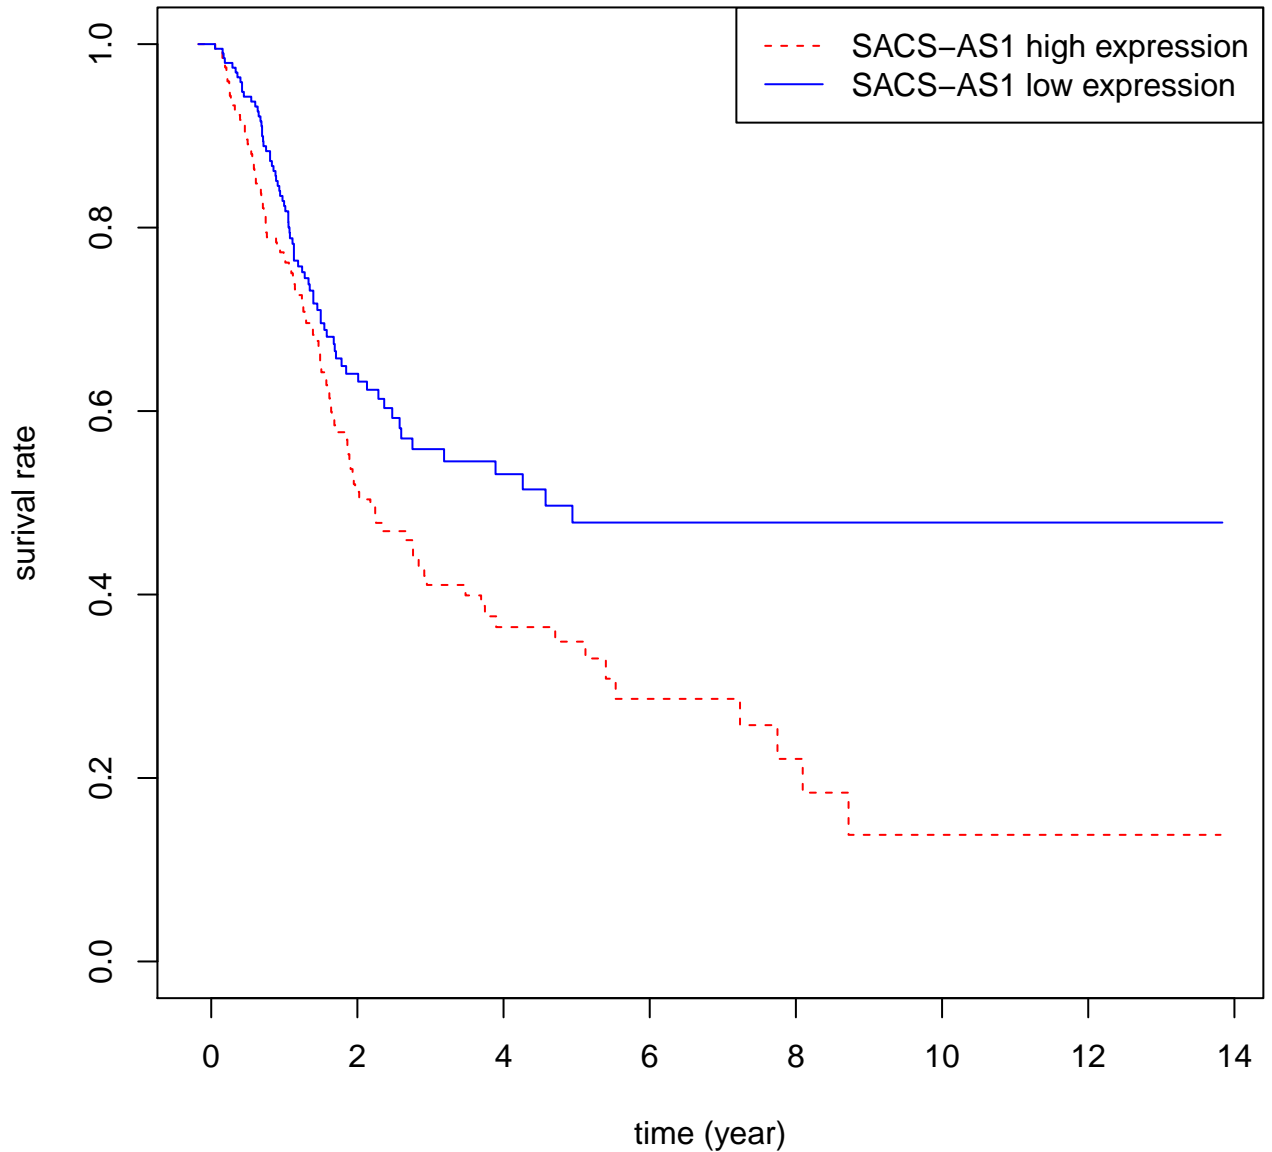

survival curve (p=0.03307)

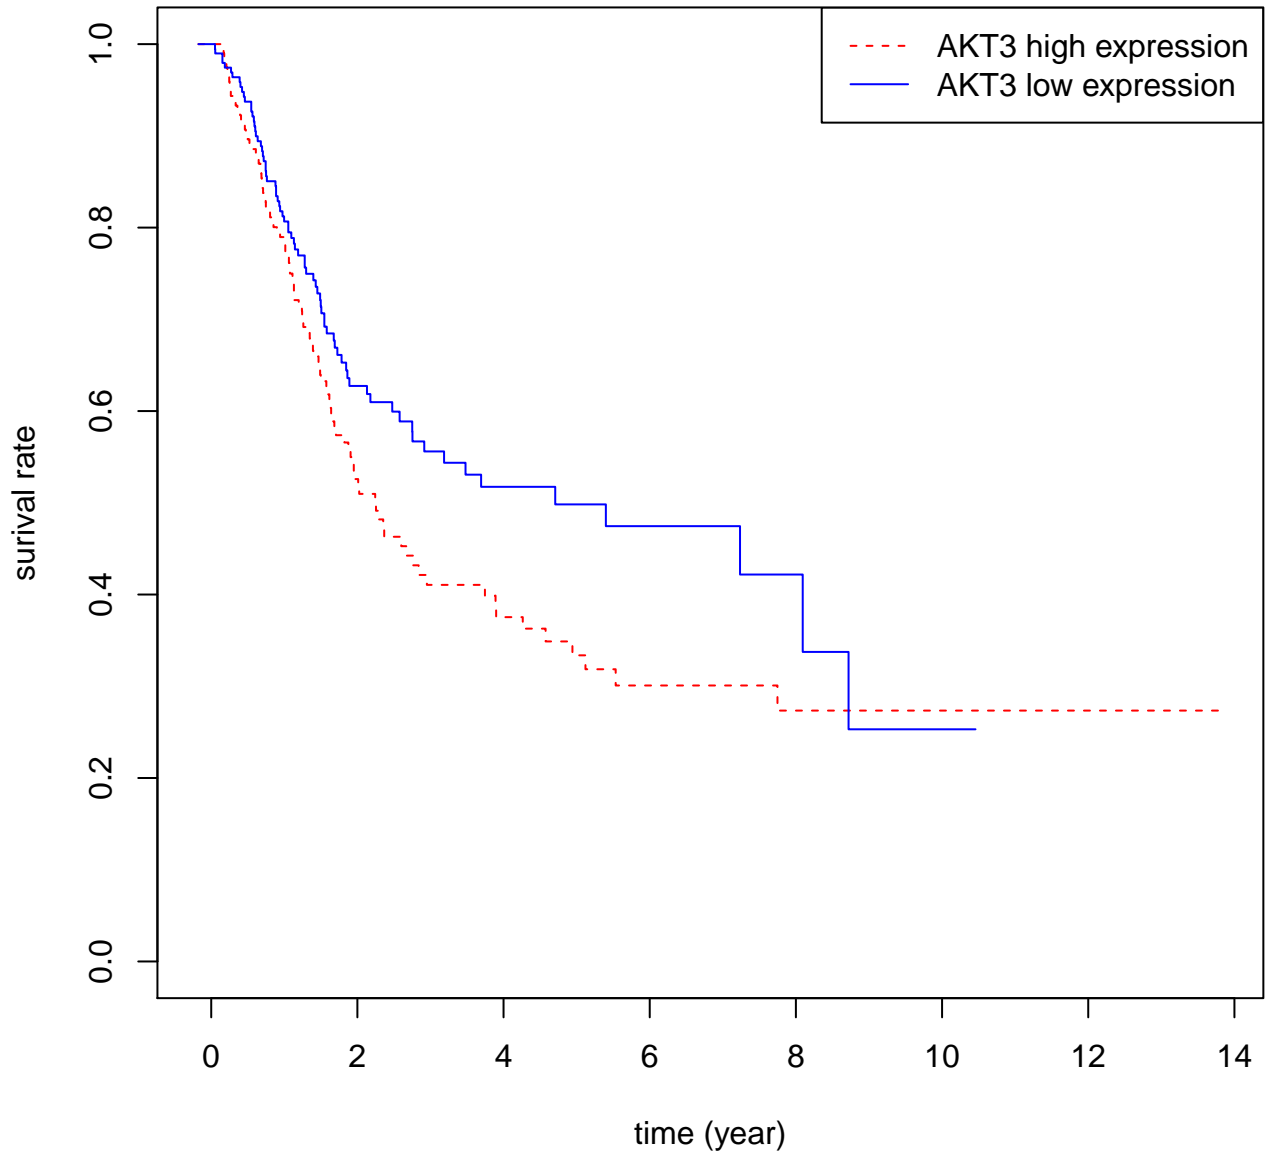

survival curve (p=0.01065)

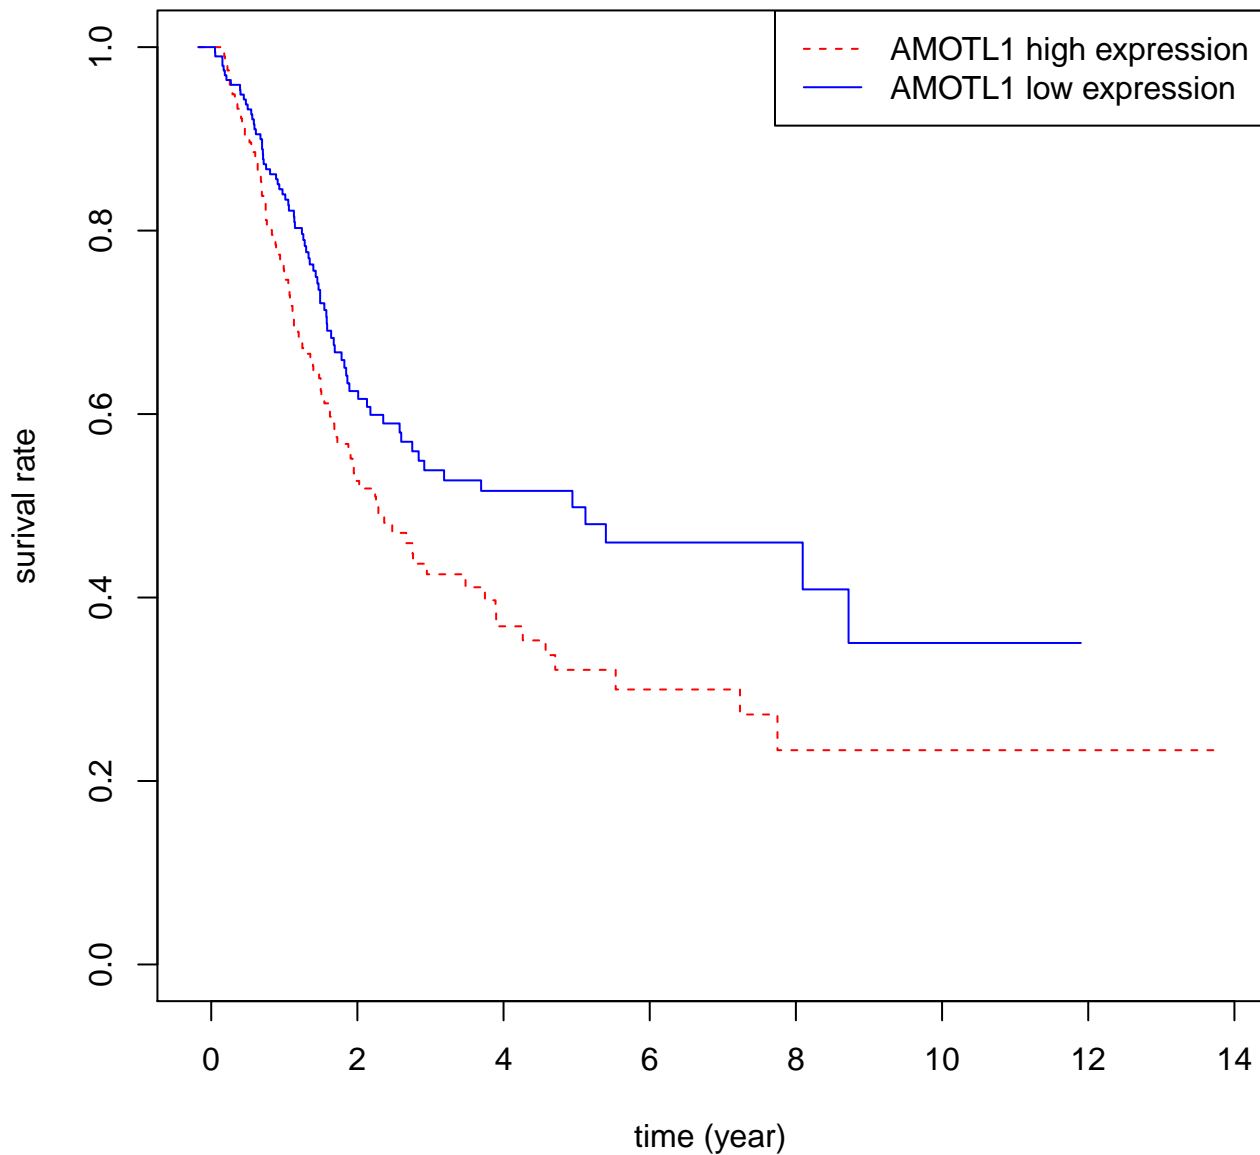



survival curve (p=0.04269)

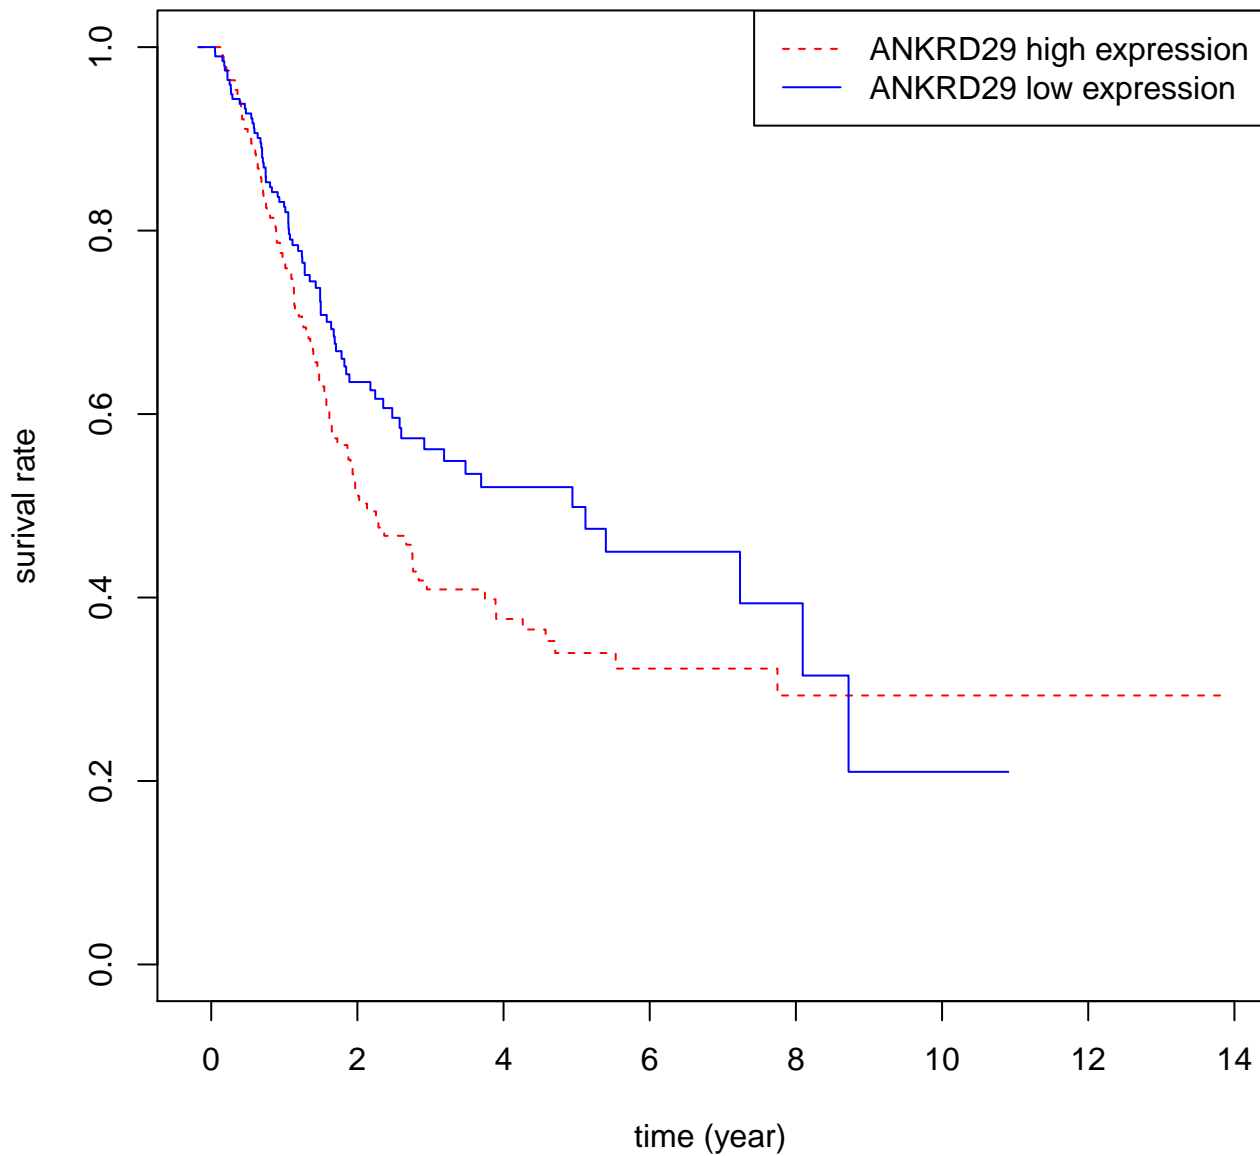

survival curve (p=0.01648)

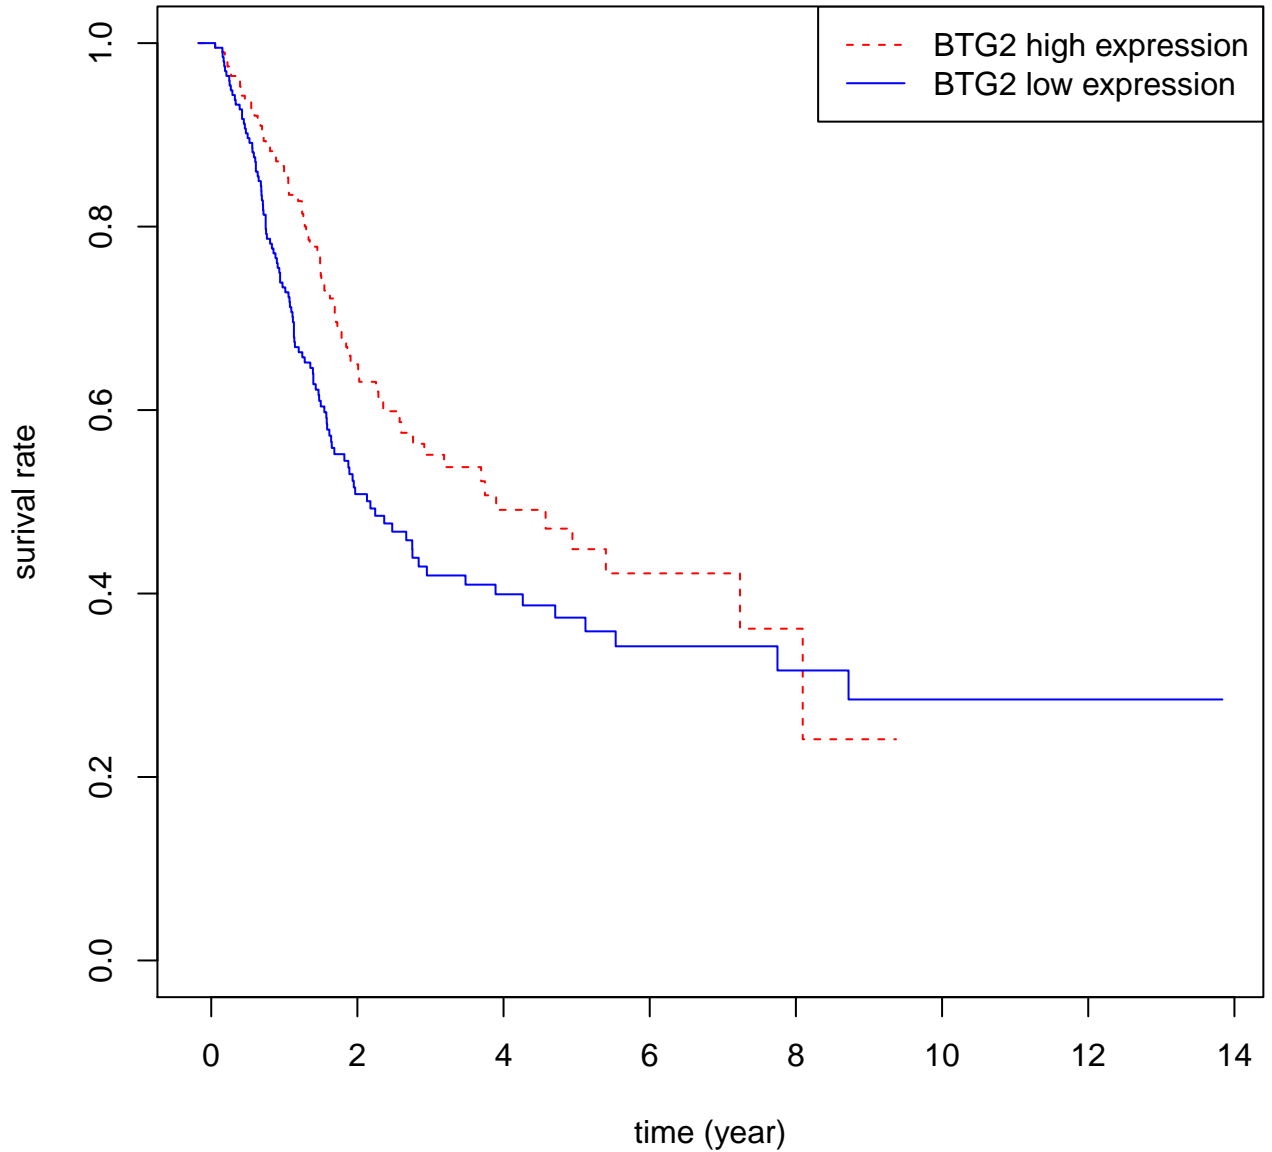

survival curve (p=0.00987)

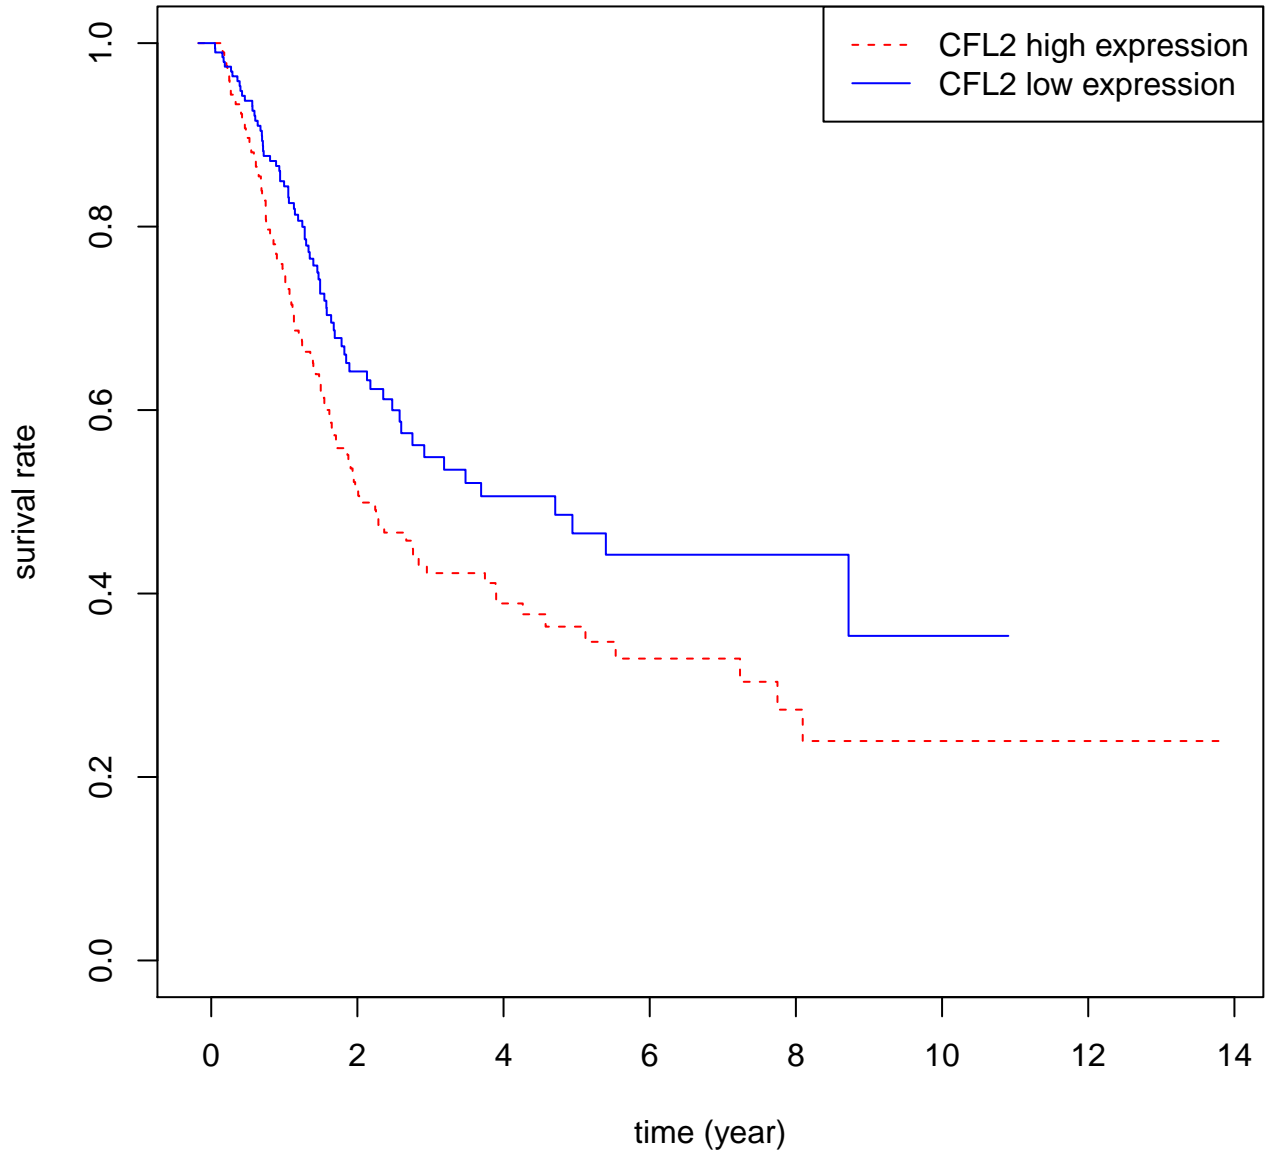

survival curve (p=0.01157)

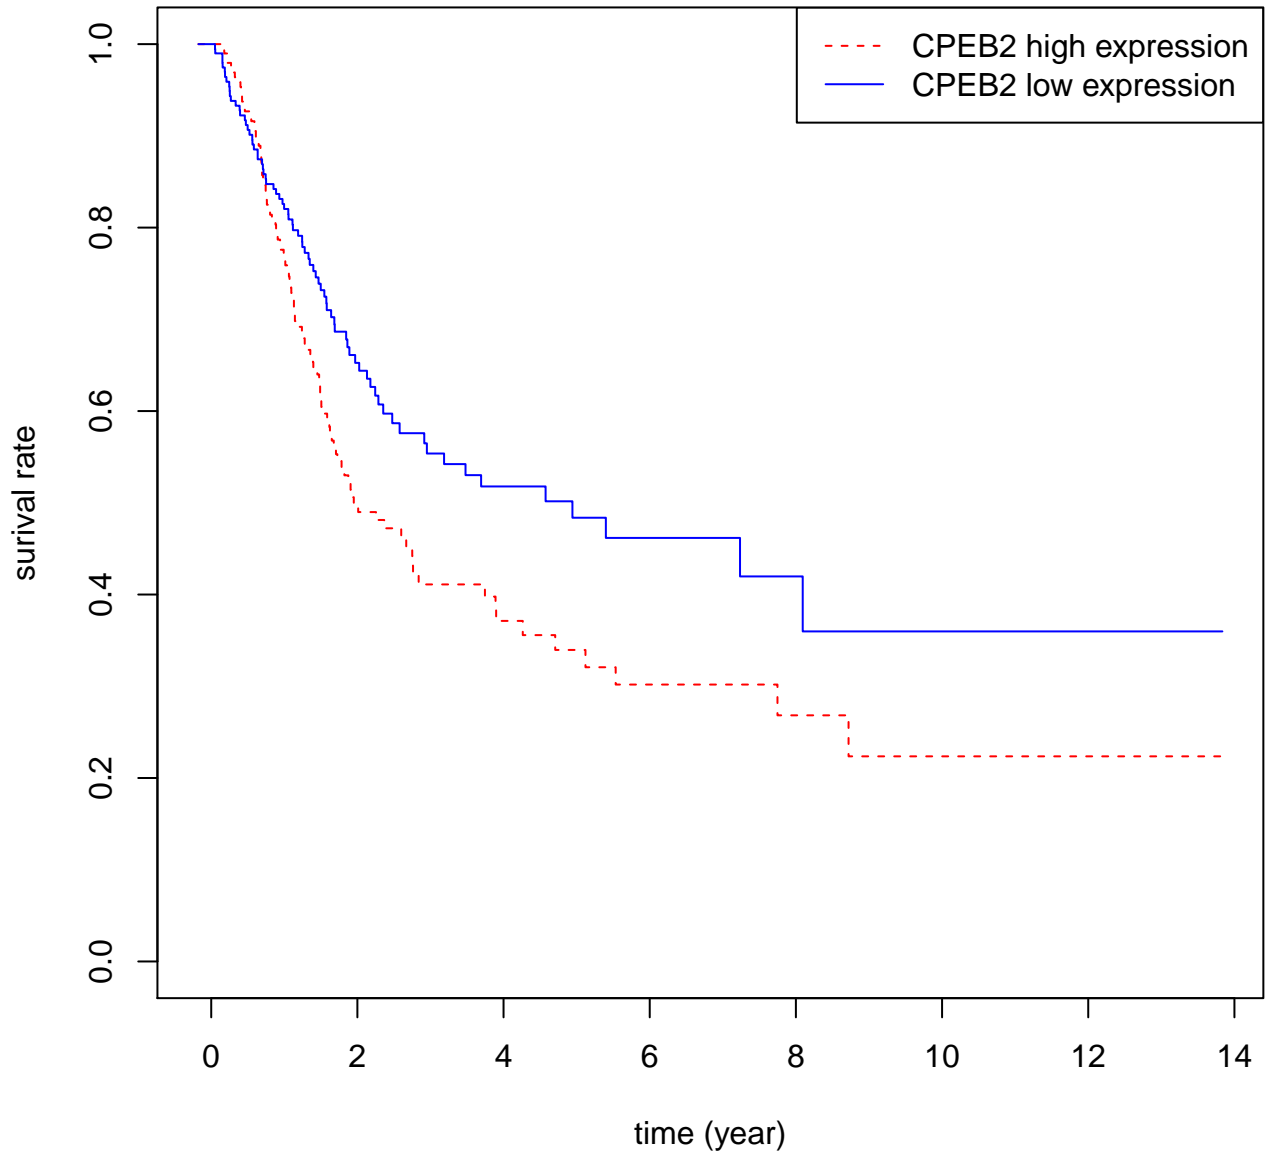

survival curve (p=0.00301)

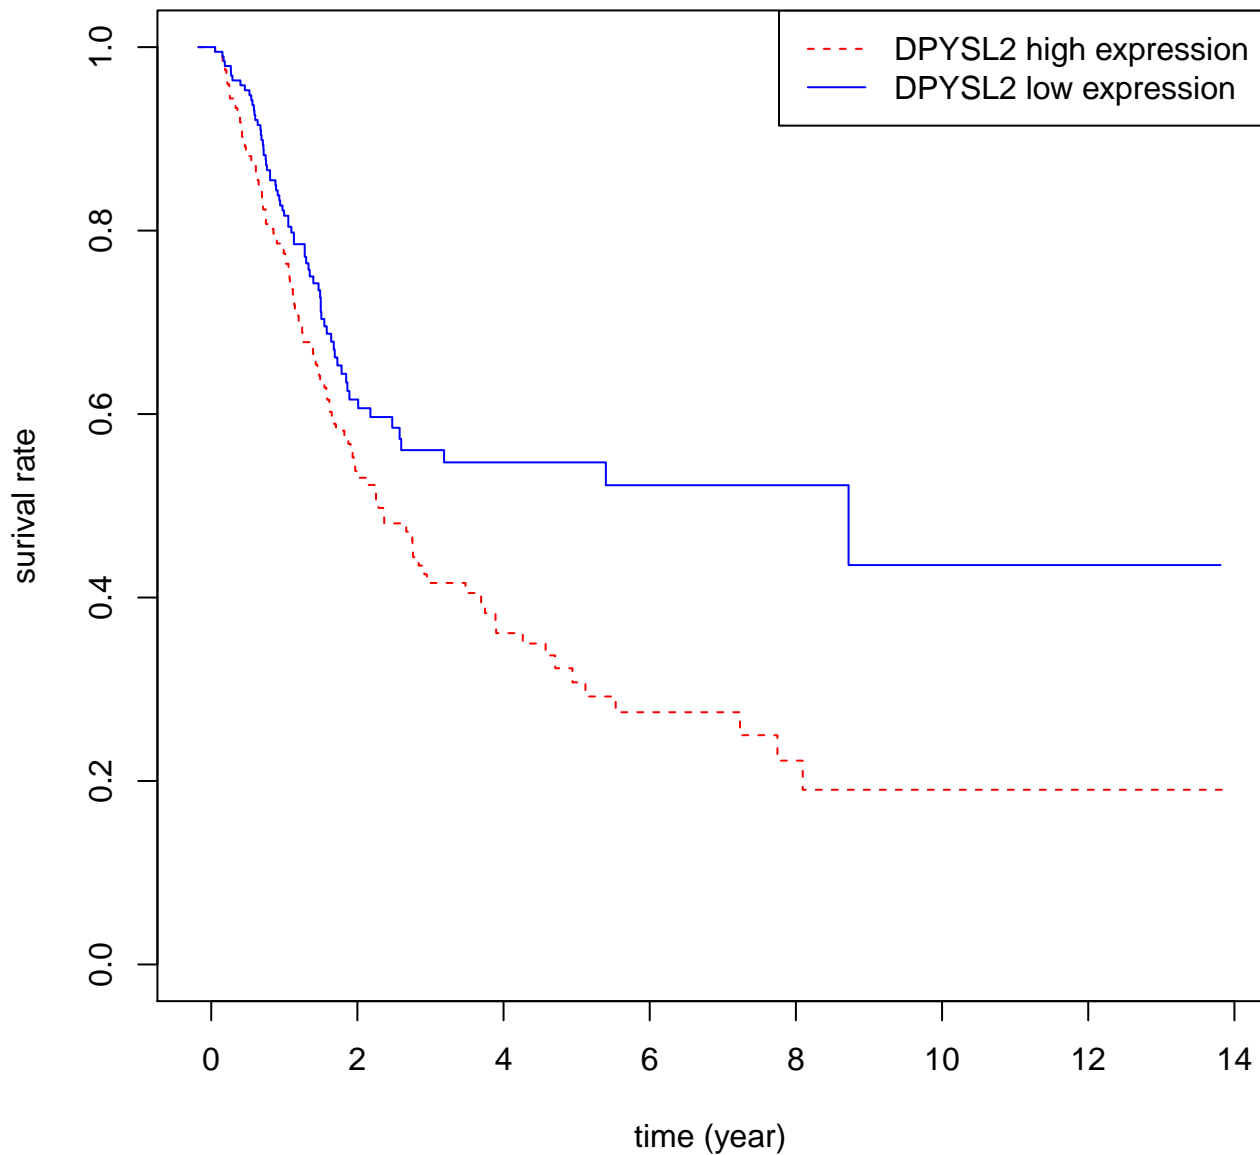

survival curve (p=0.0108)

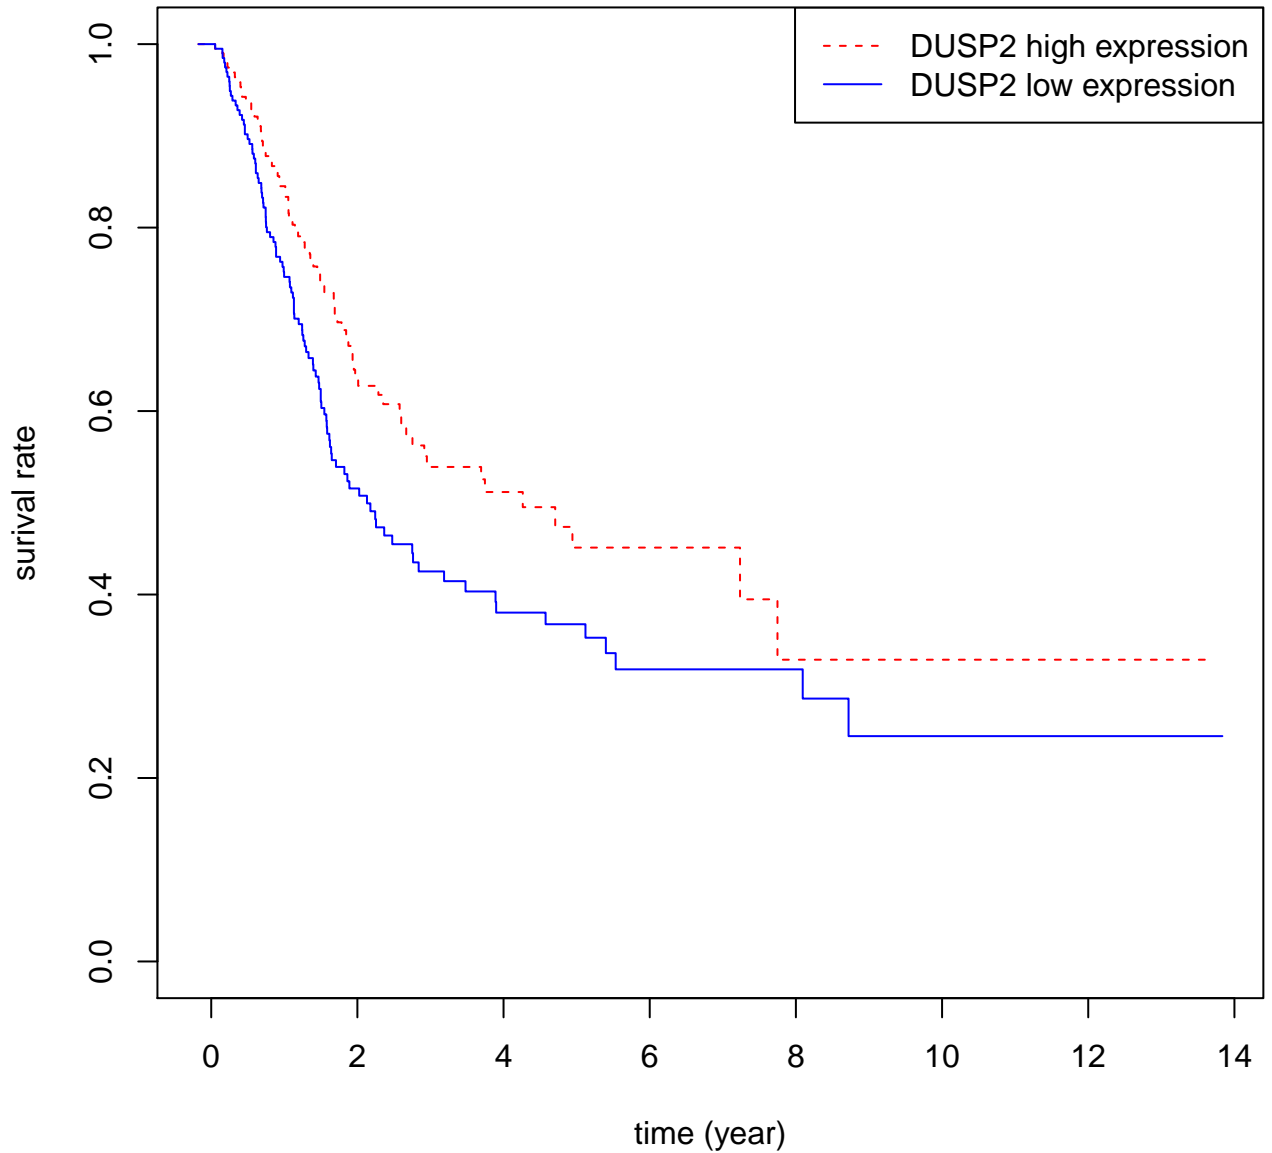

survival curve (p=0.00585)

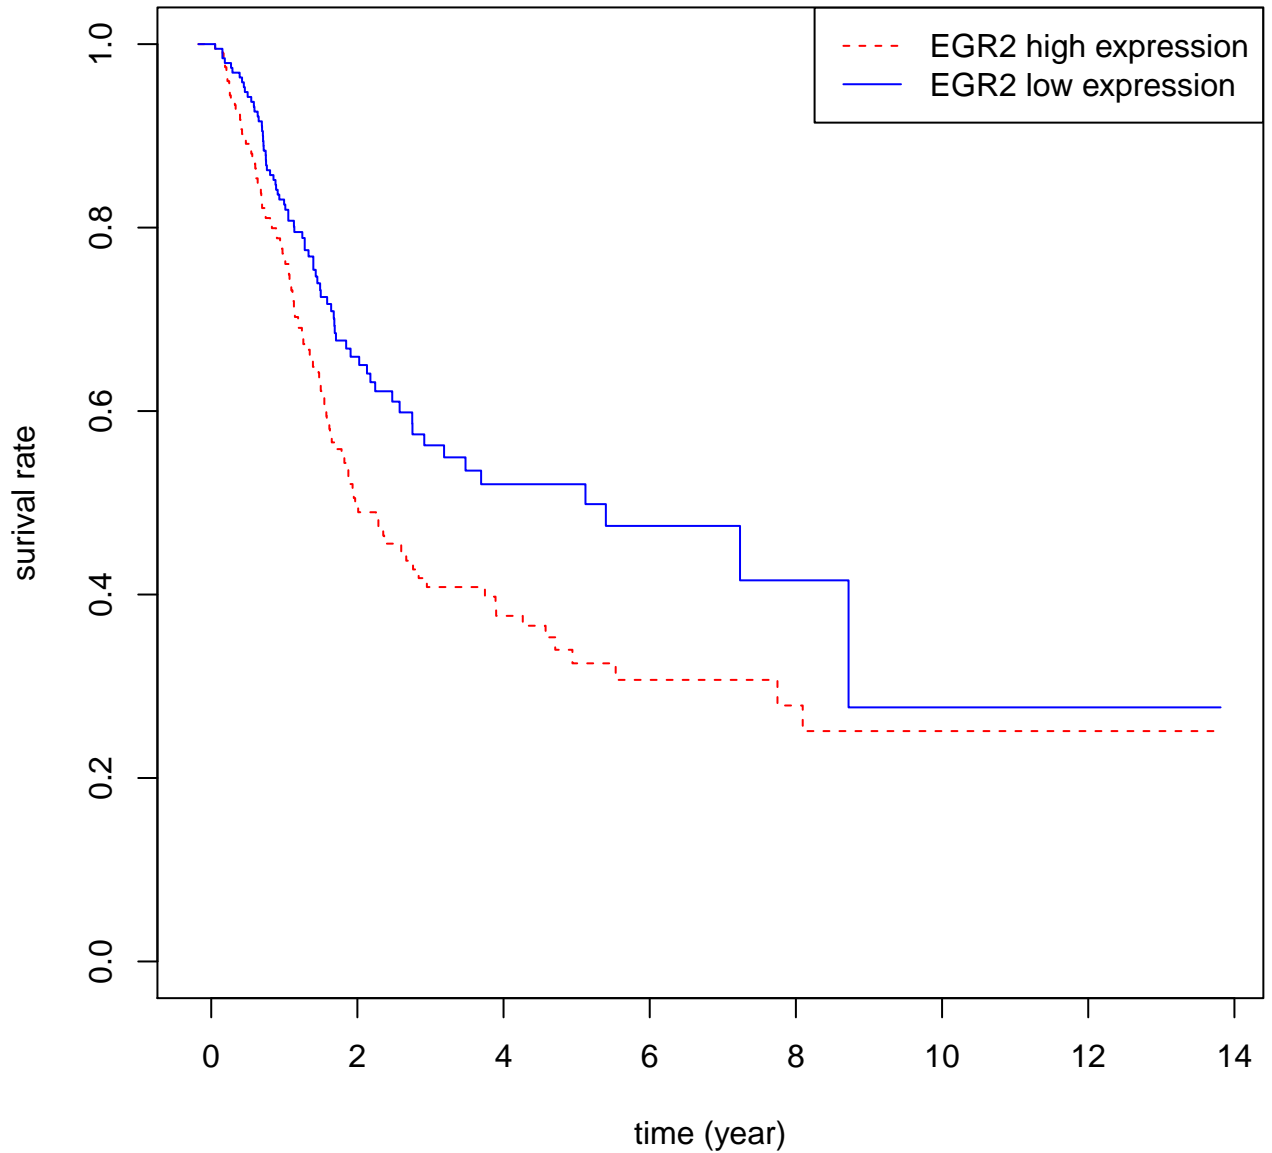

survival curve (p=0.00927)

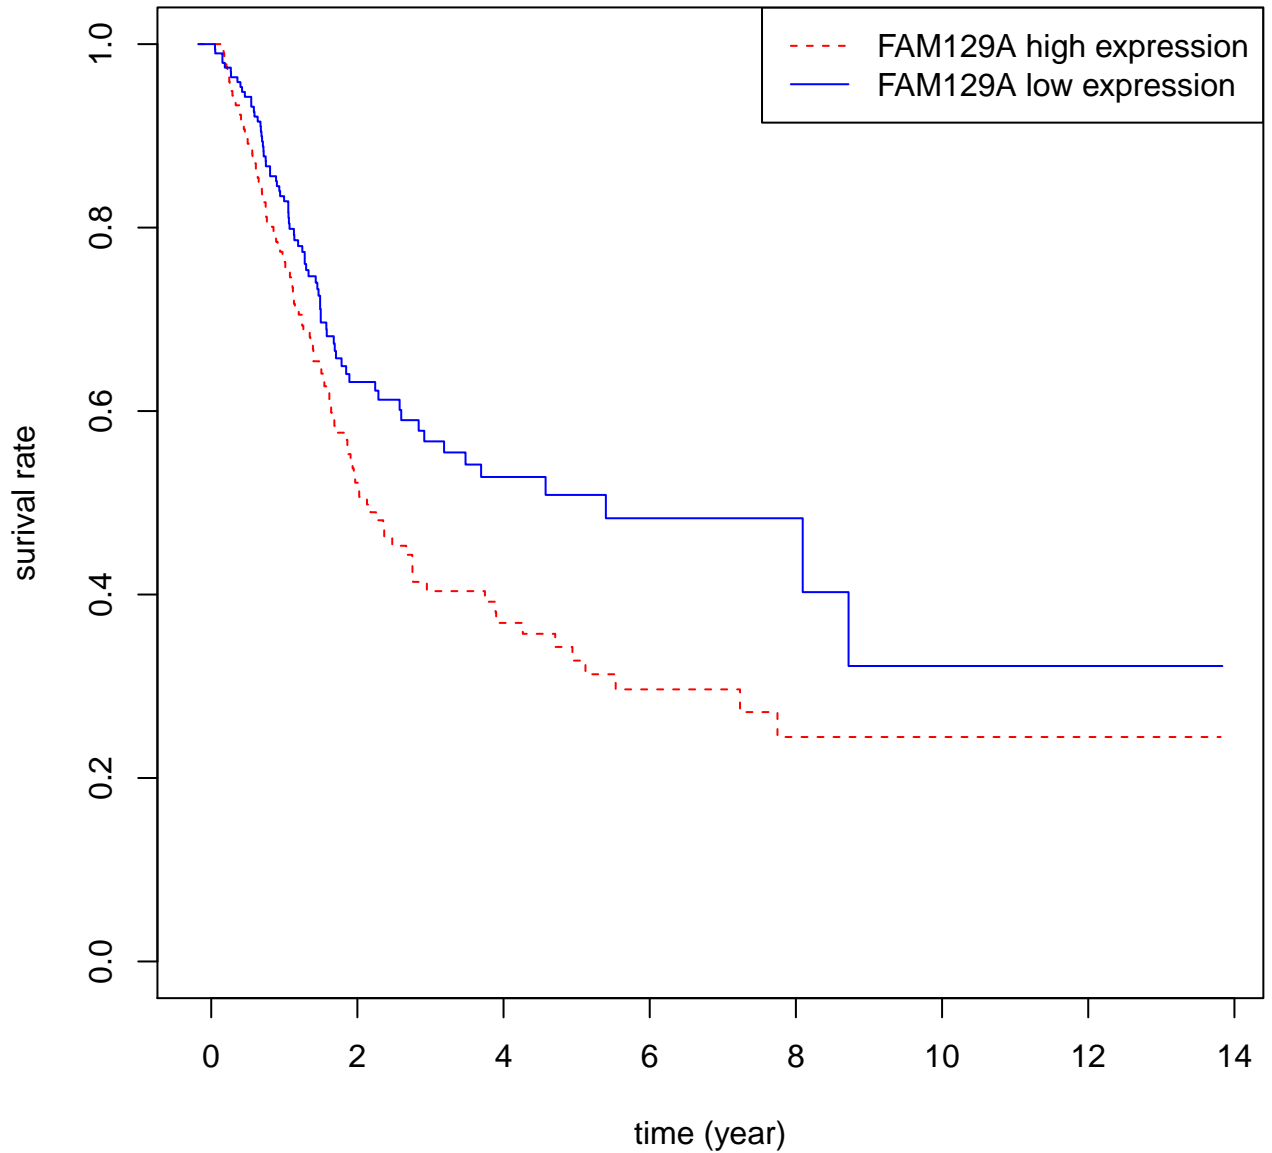



survival curve (p=0.03576)

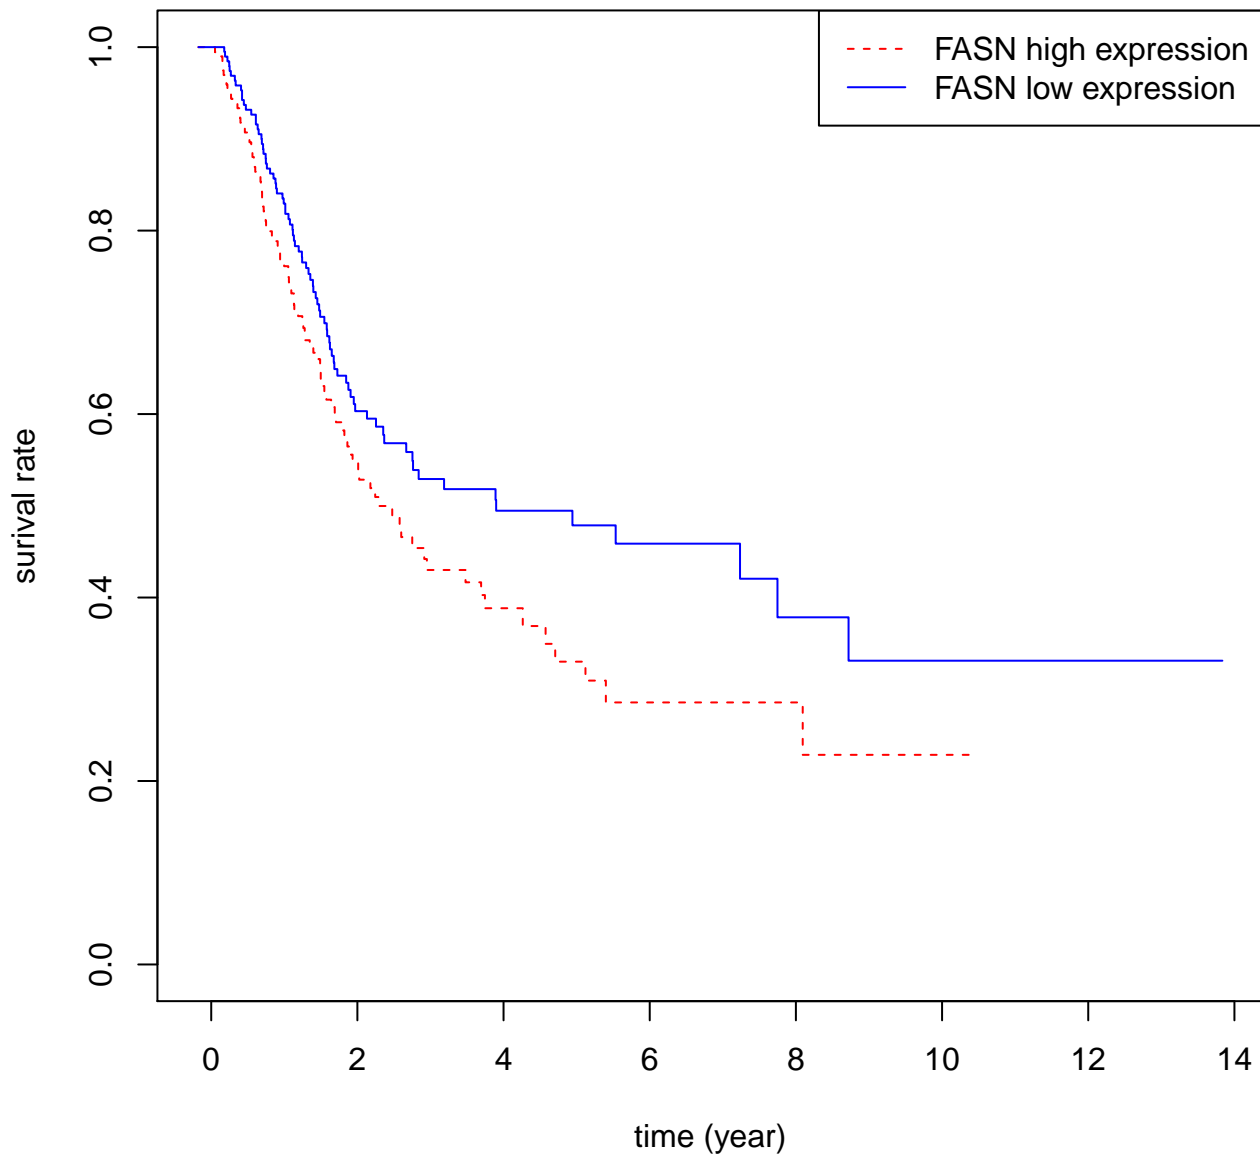

survival curve (p=0.02815)

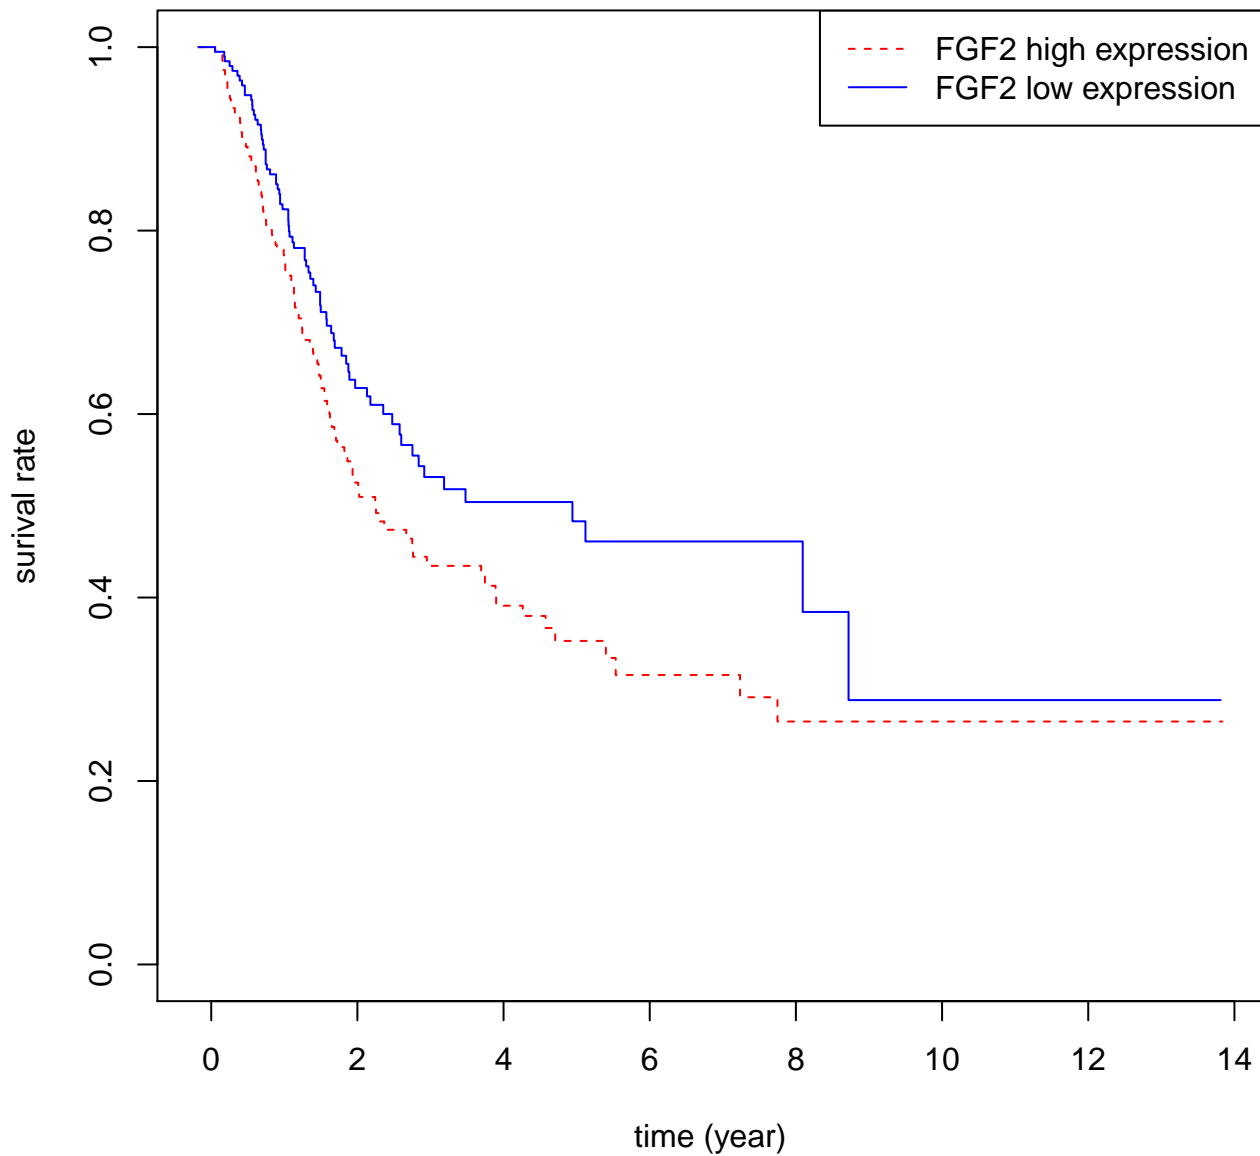

survival curve (p=0.02703)

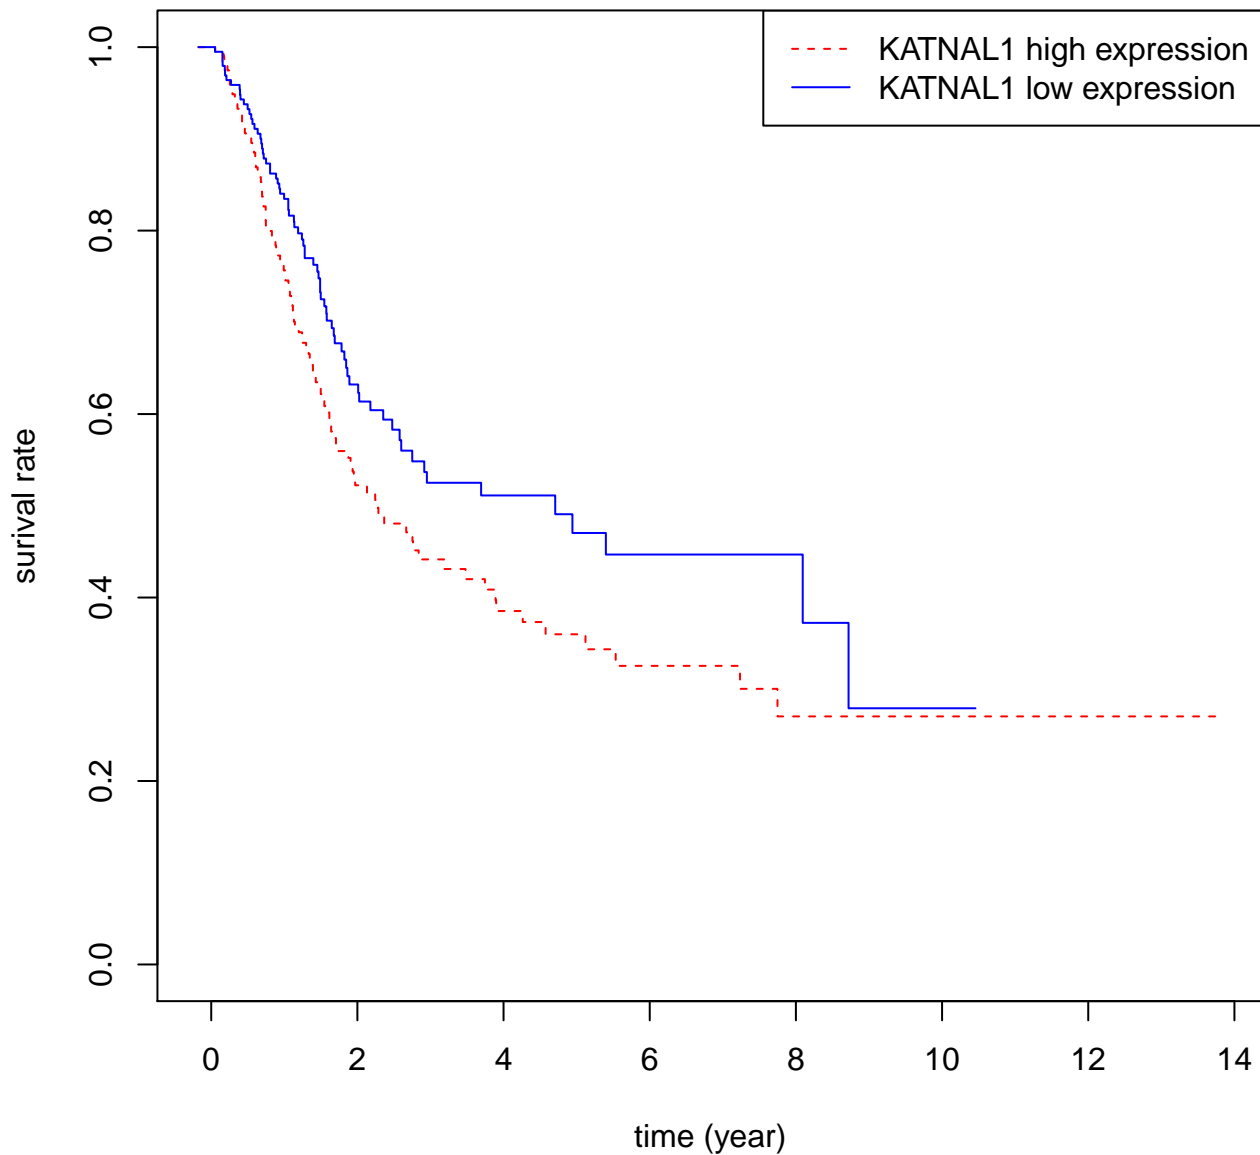

survival curve (p=0.02146)

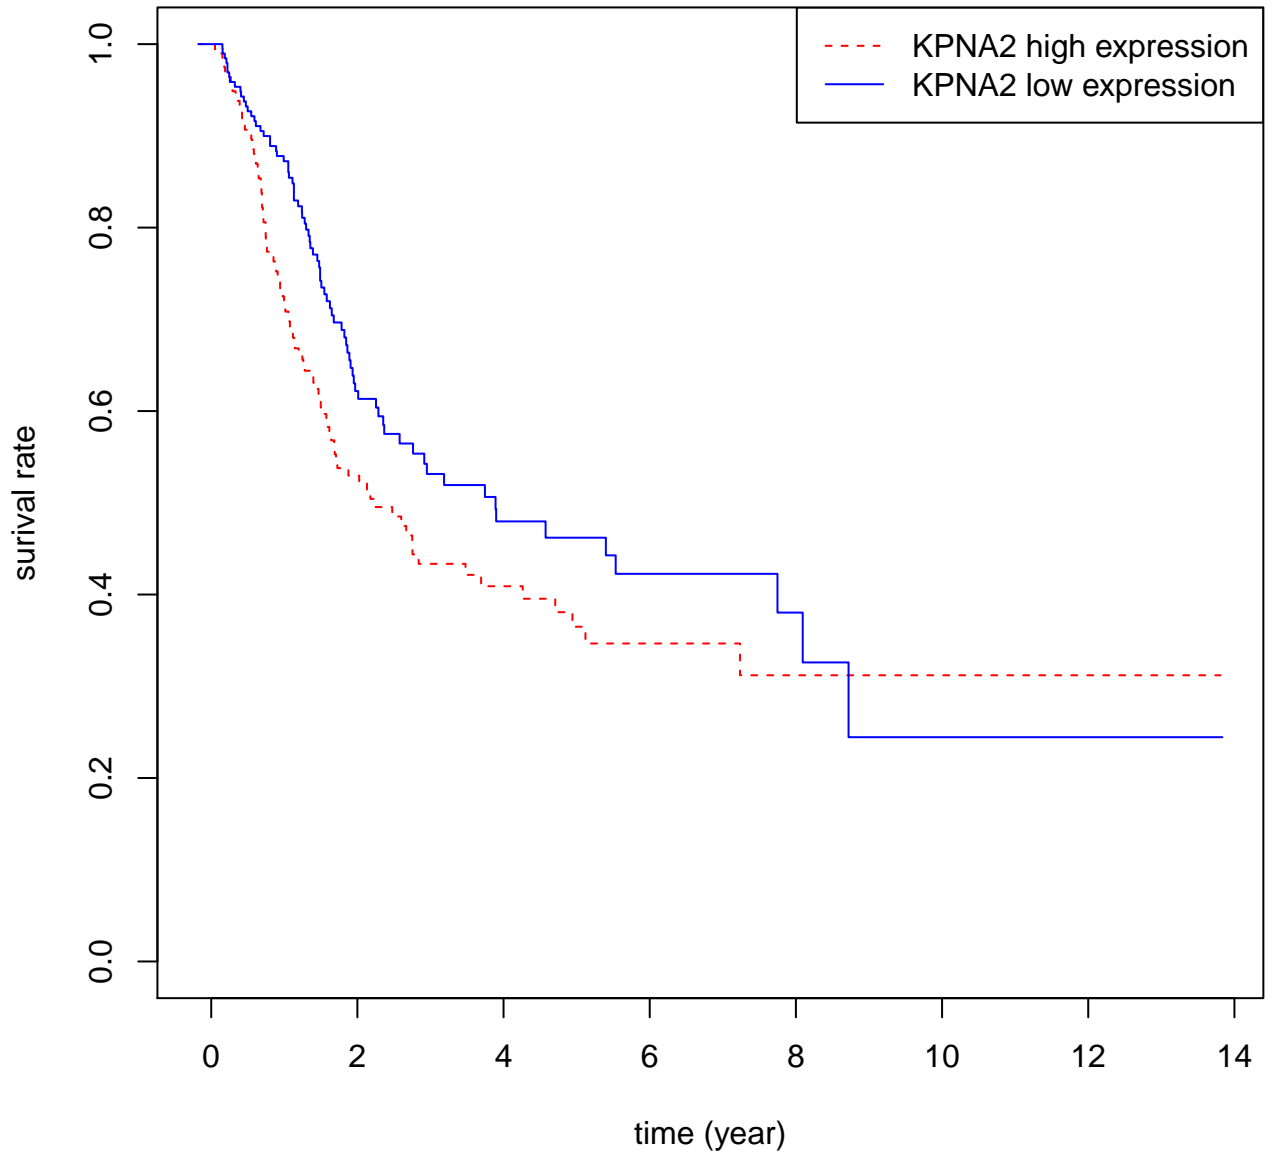

survival curve (p=0.00037)

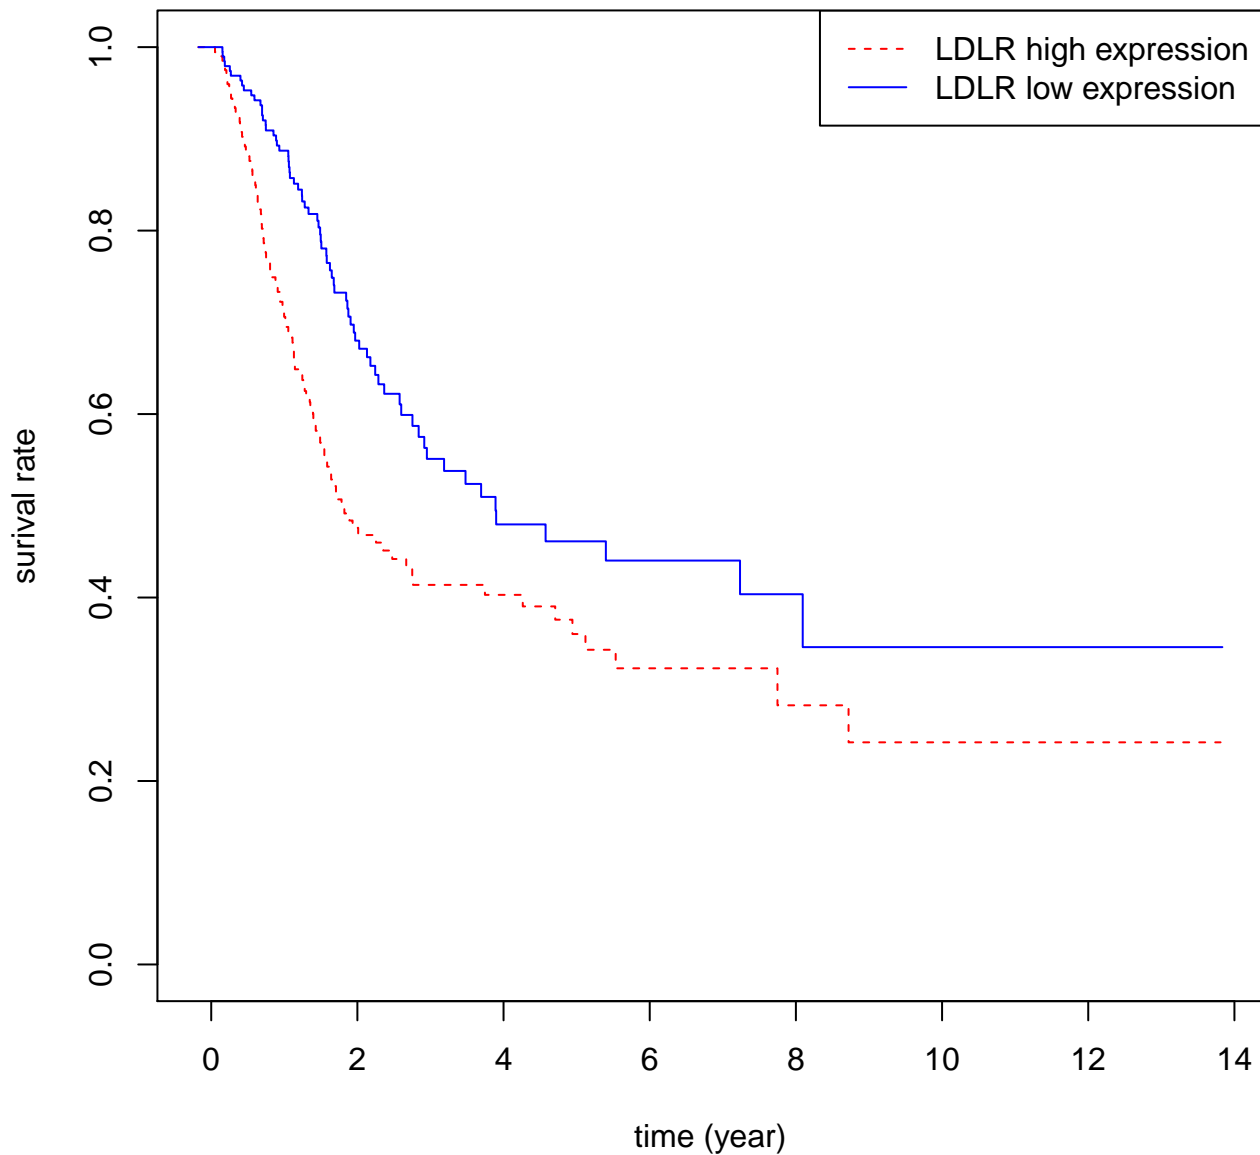

survival curve (p=0.0094)

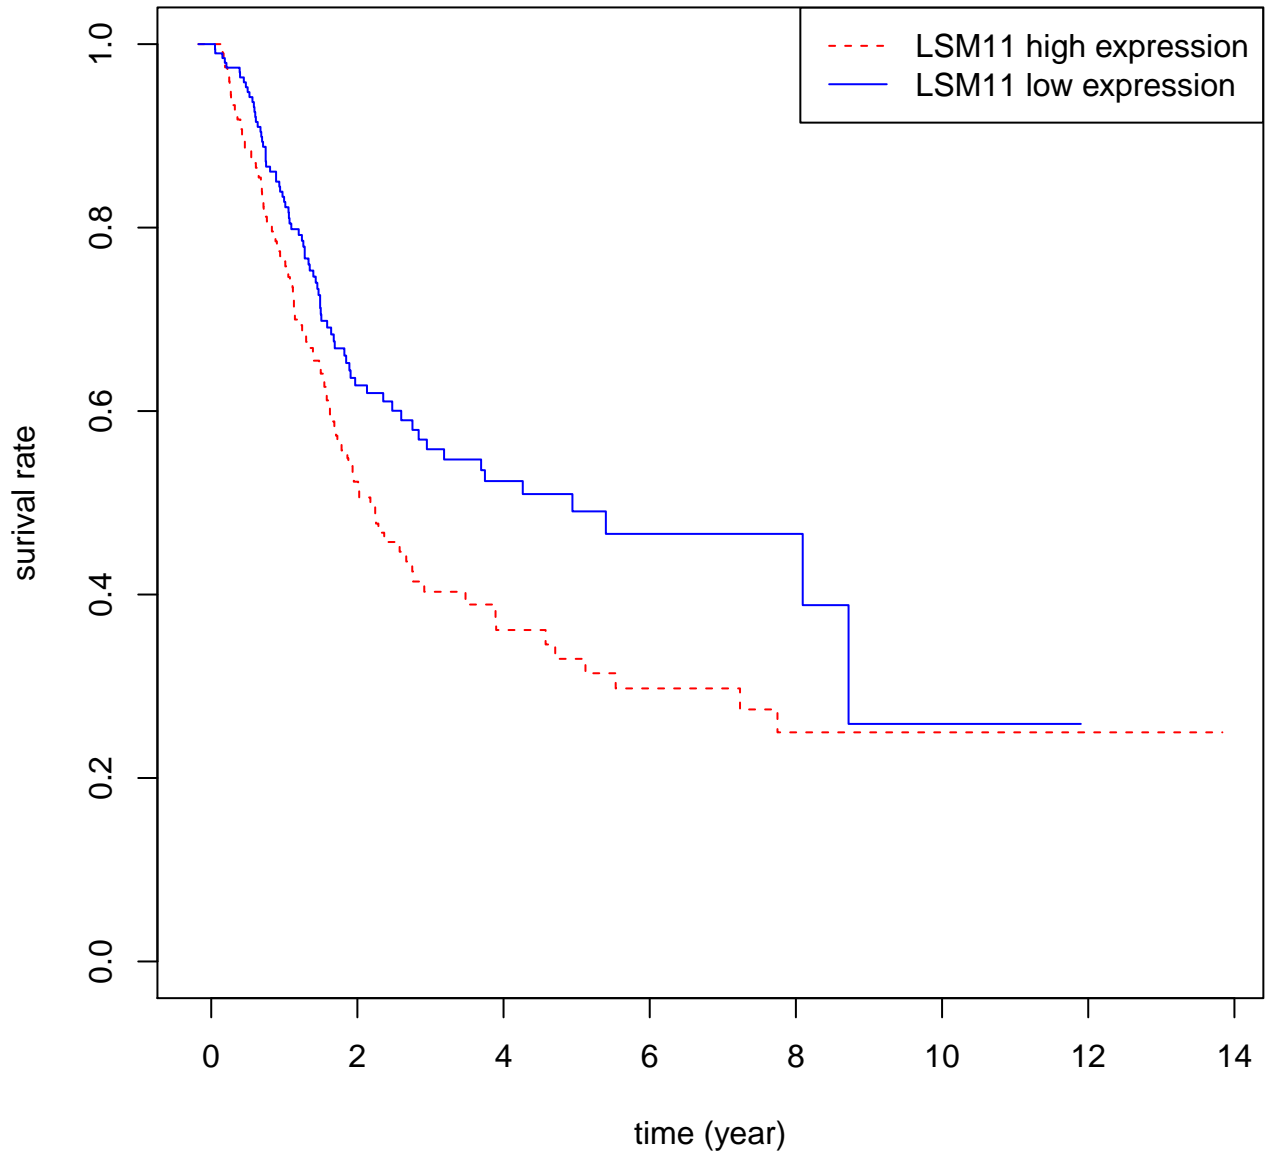

survival curve (p=0.01123)

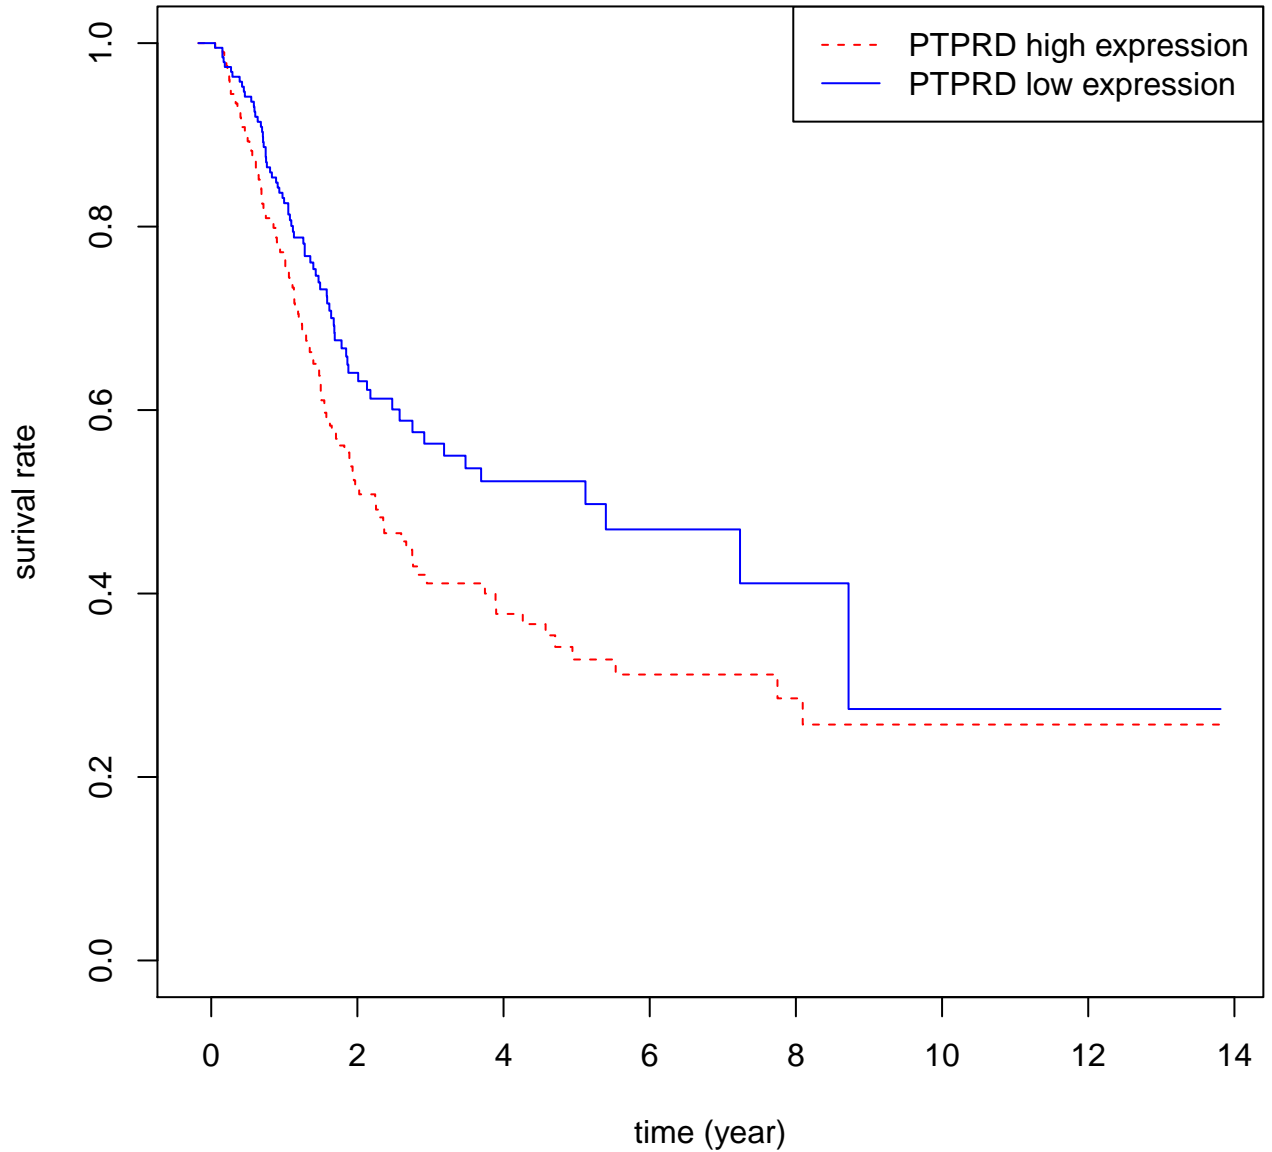

survival curve (p=0.01191)

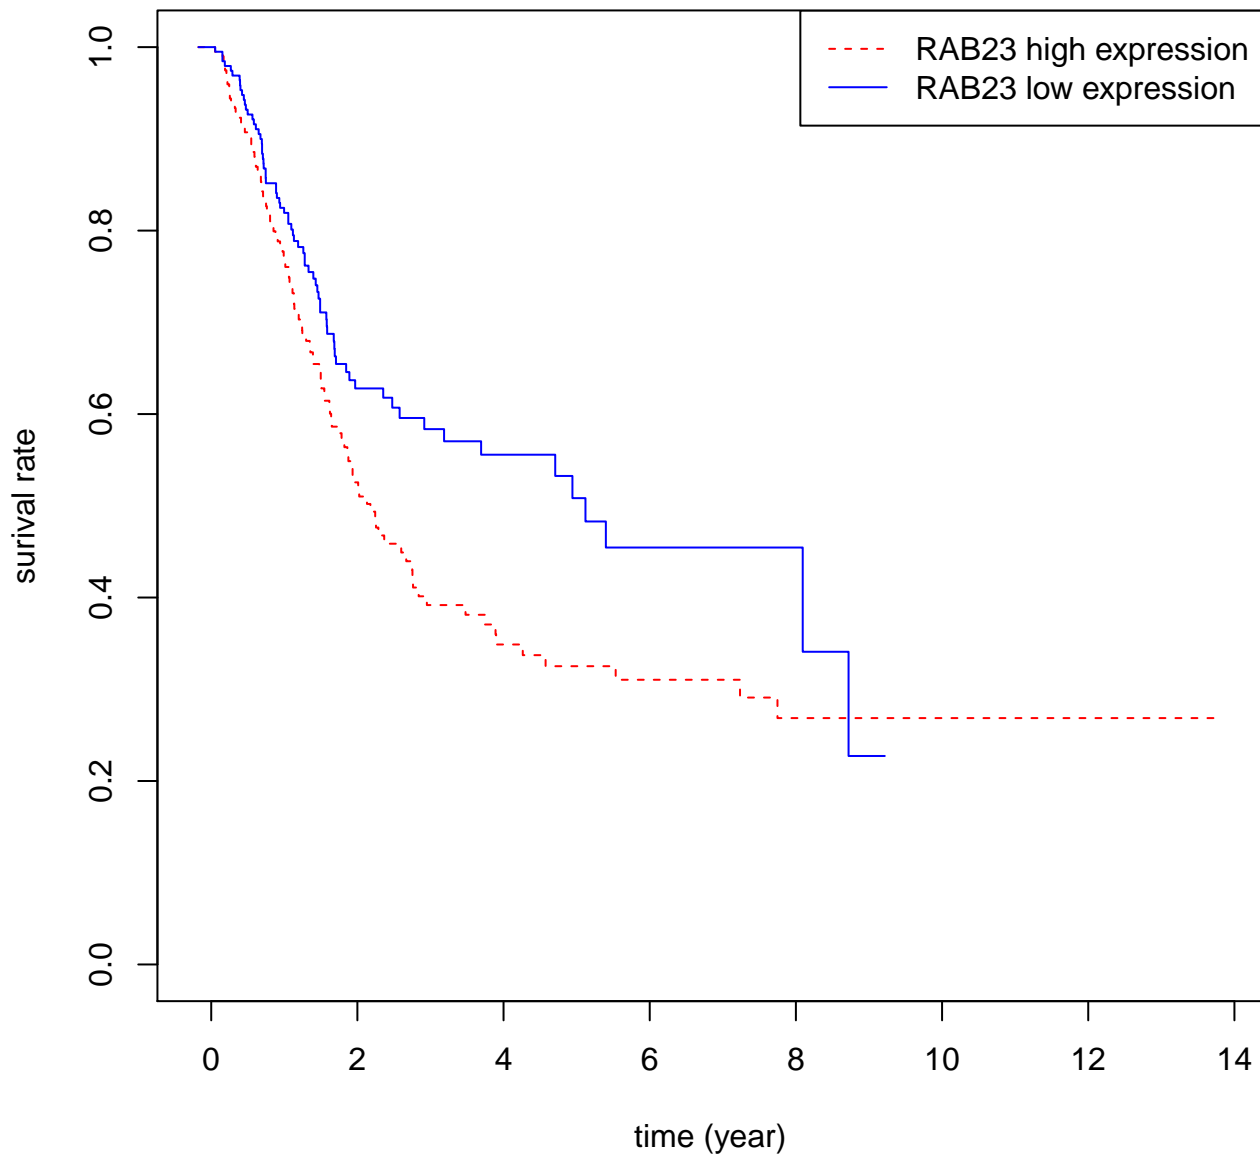



survival curve (p=0.0386)

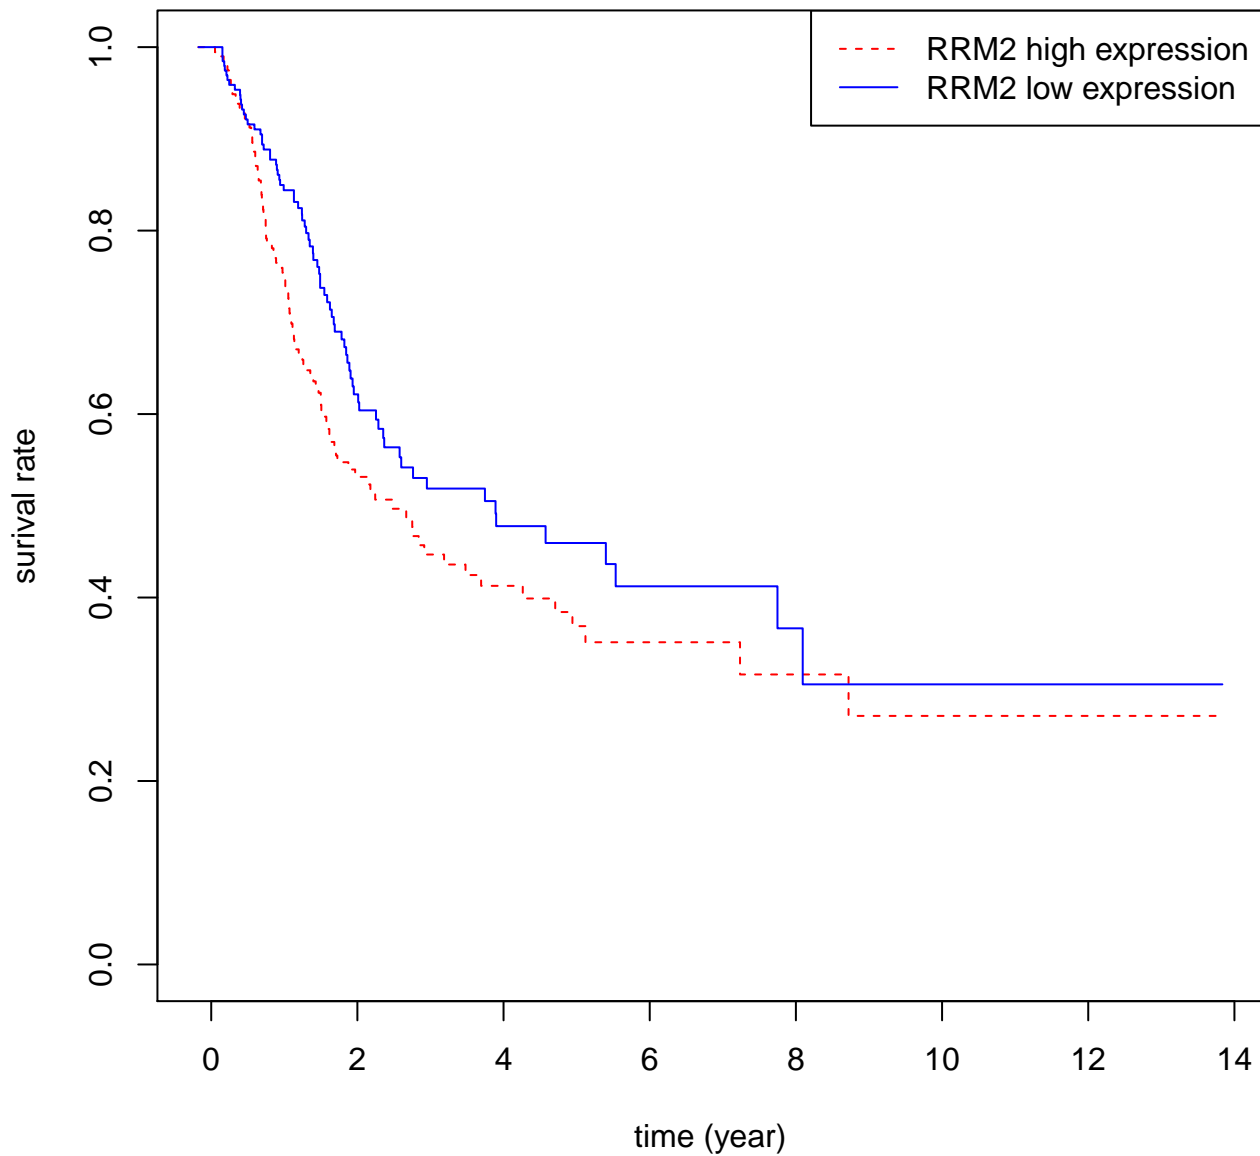

survival curve (p=0.00146)

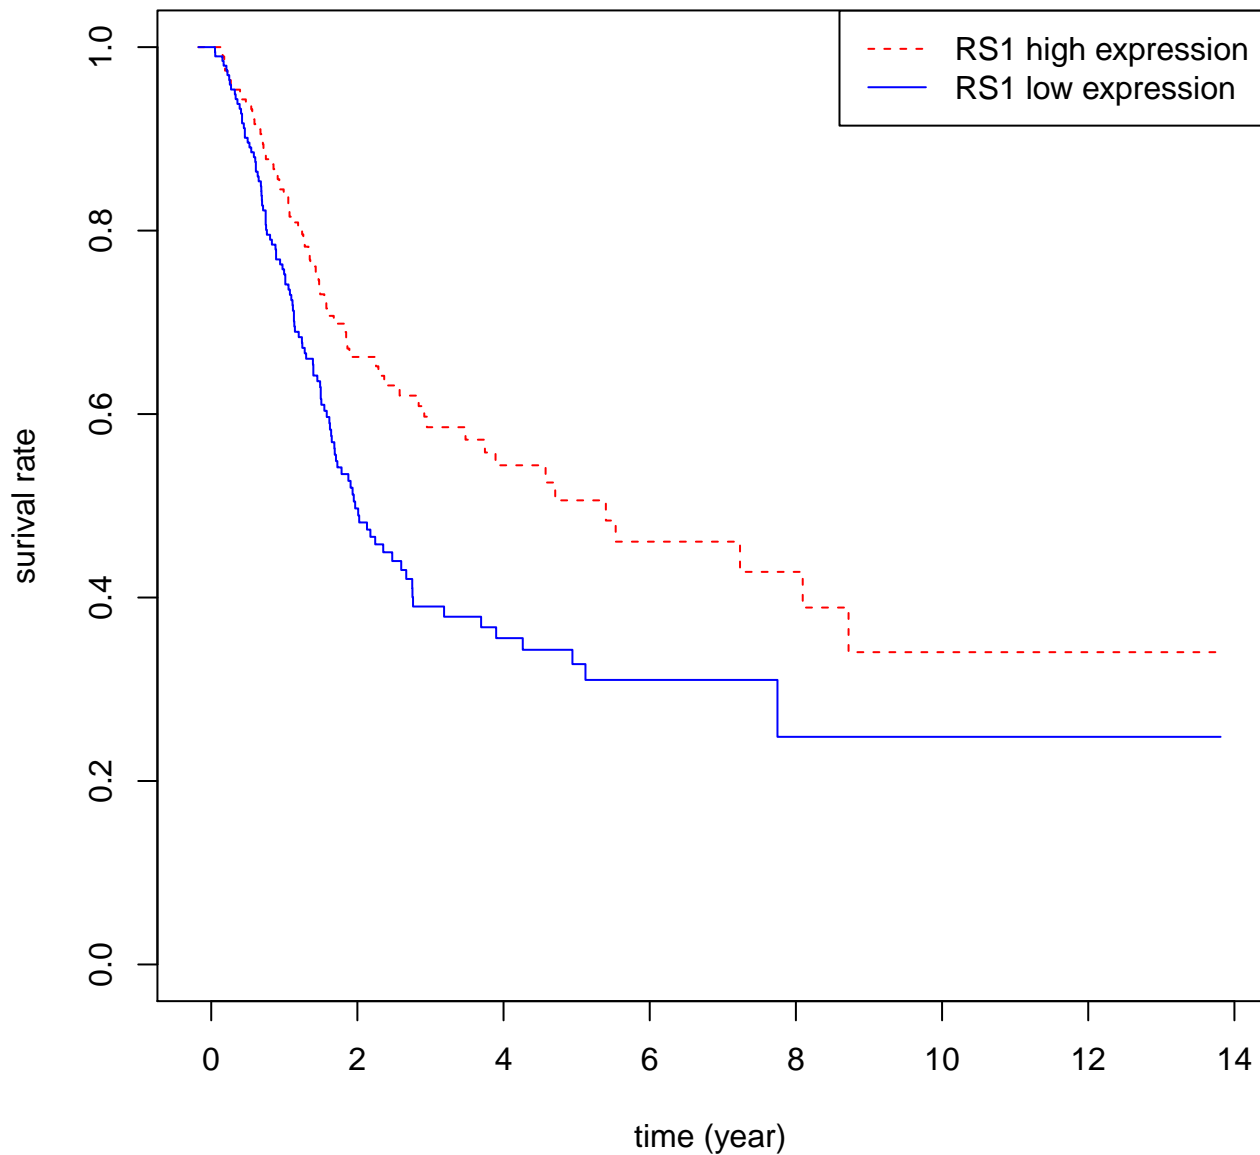

survival curve (p=0.01388)

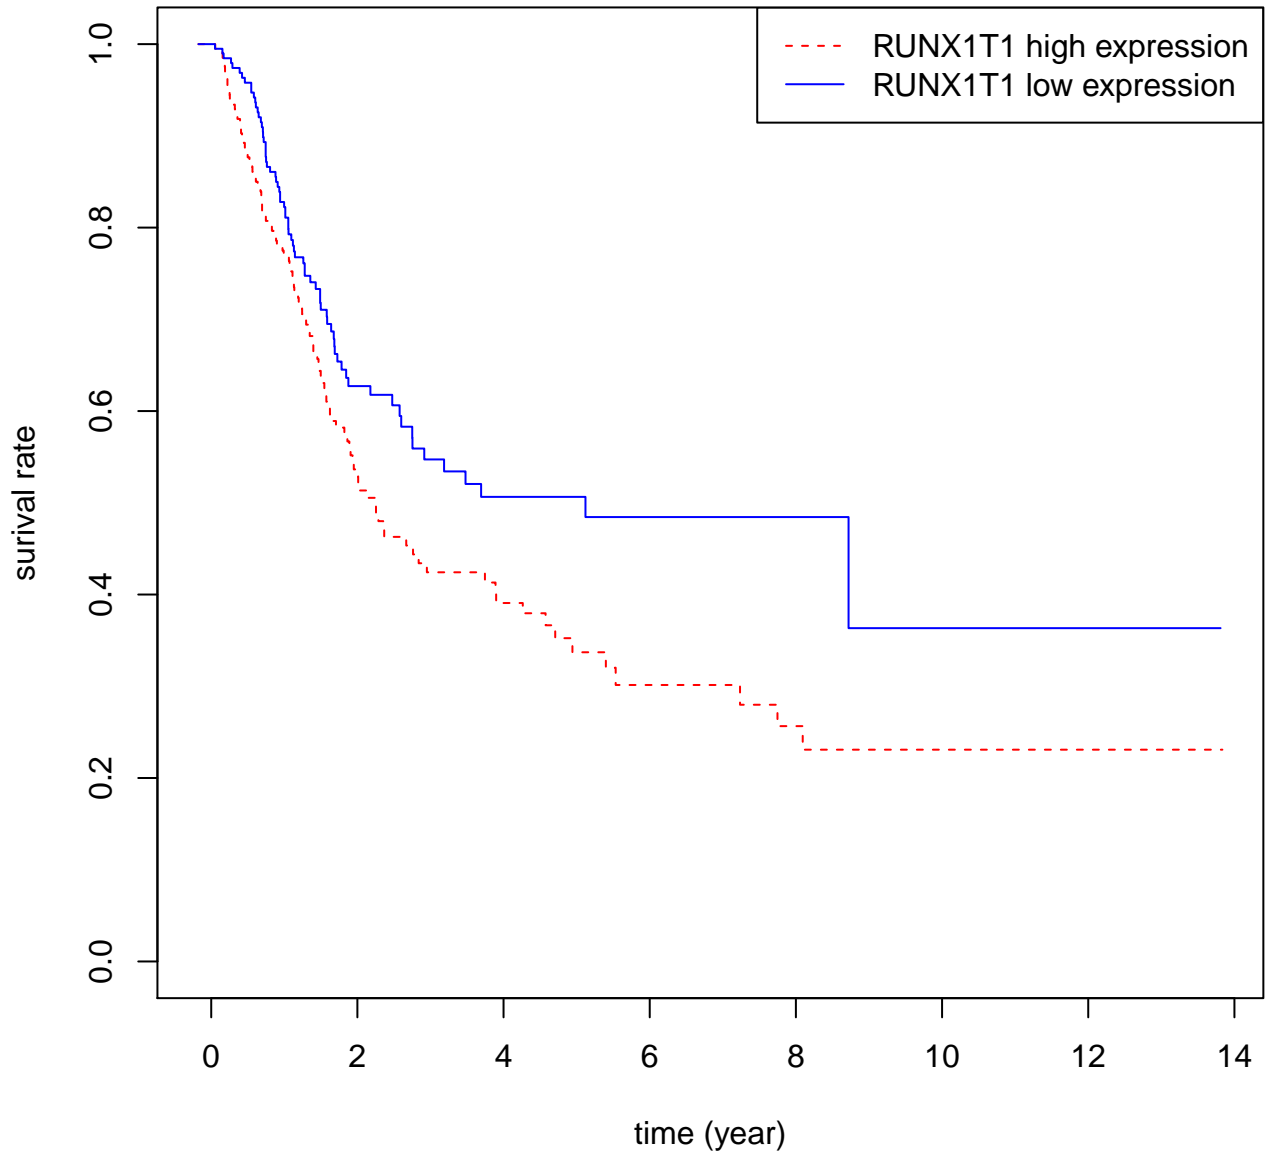

survival curve (p=0.00539)

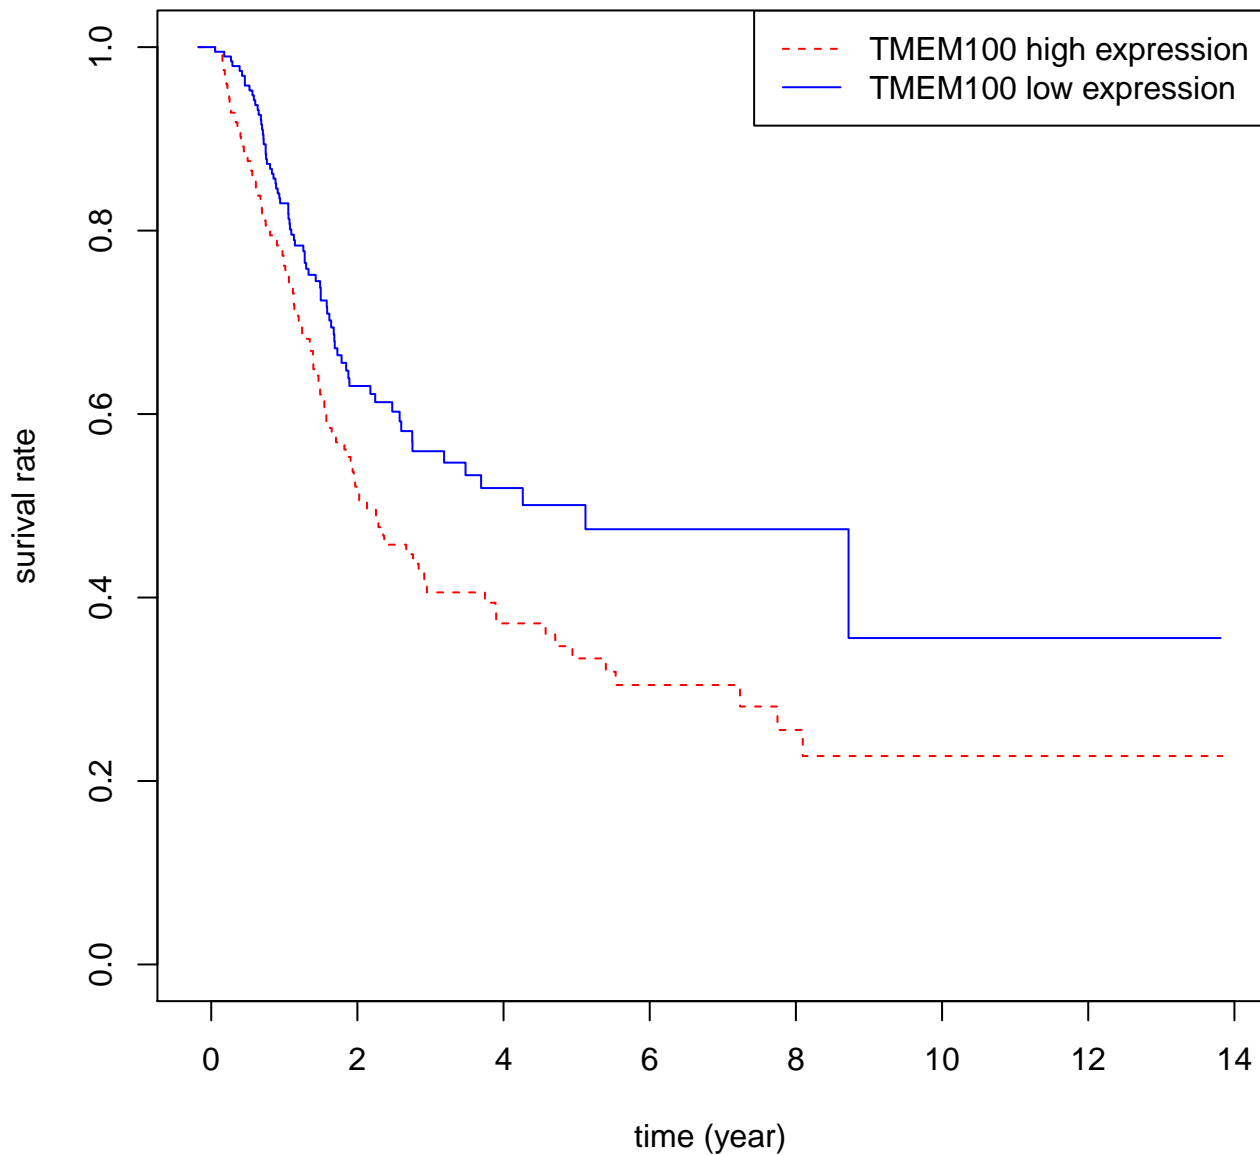

survival curve (p=0.03443)

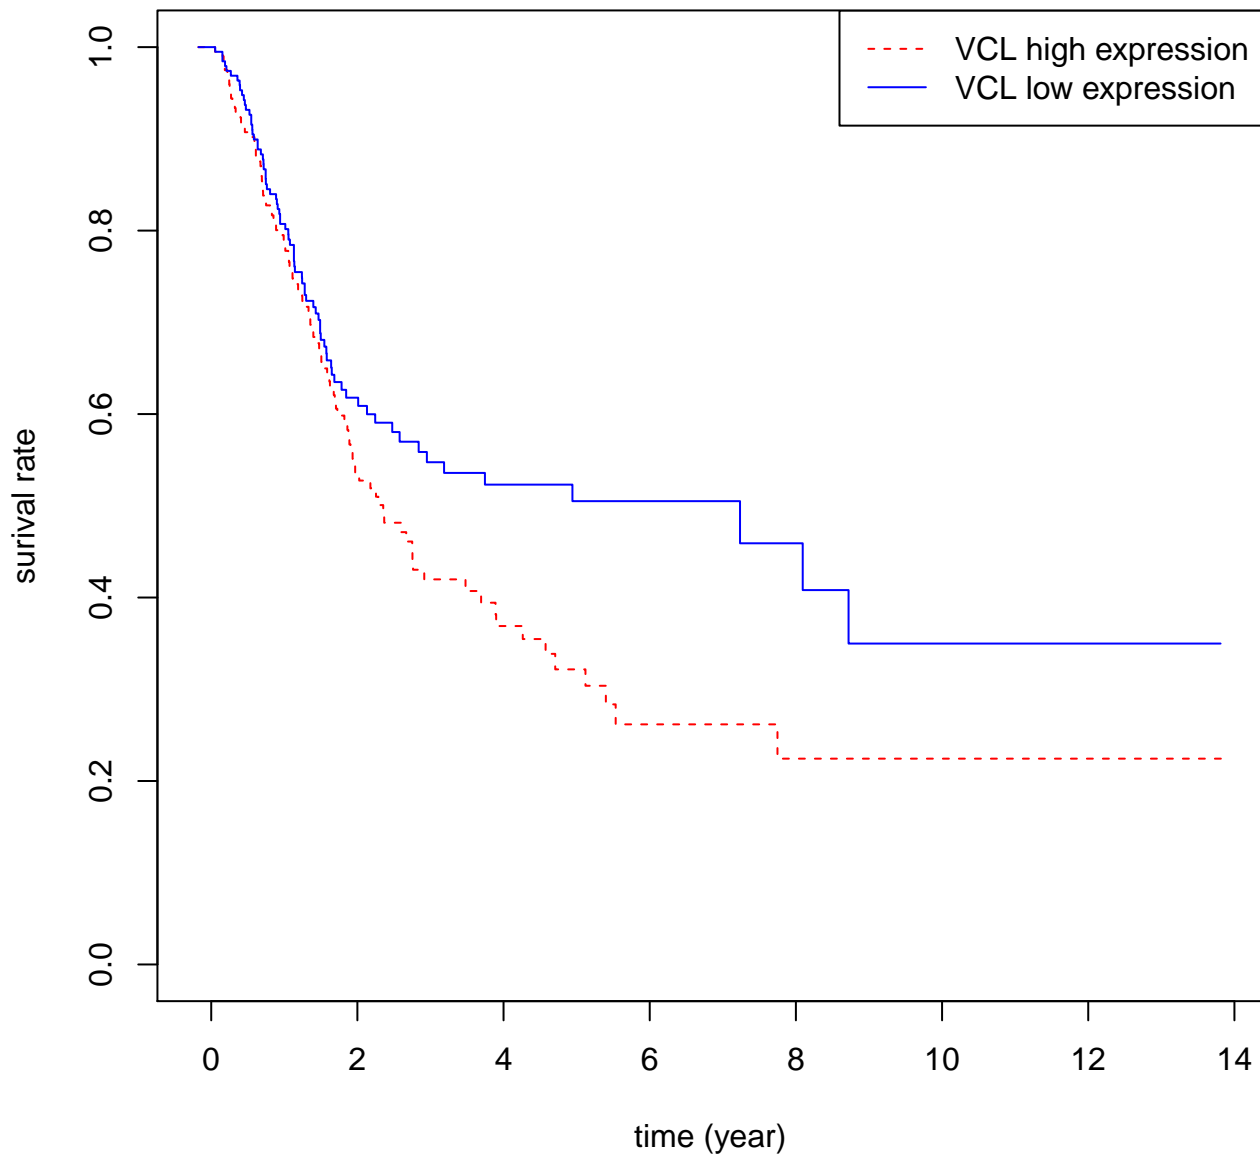

survival curve (p=0.01244)

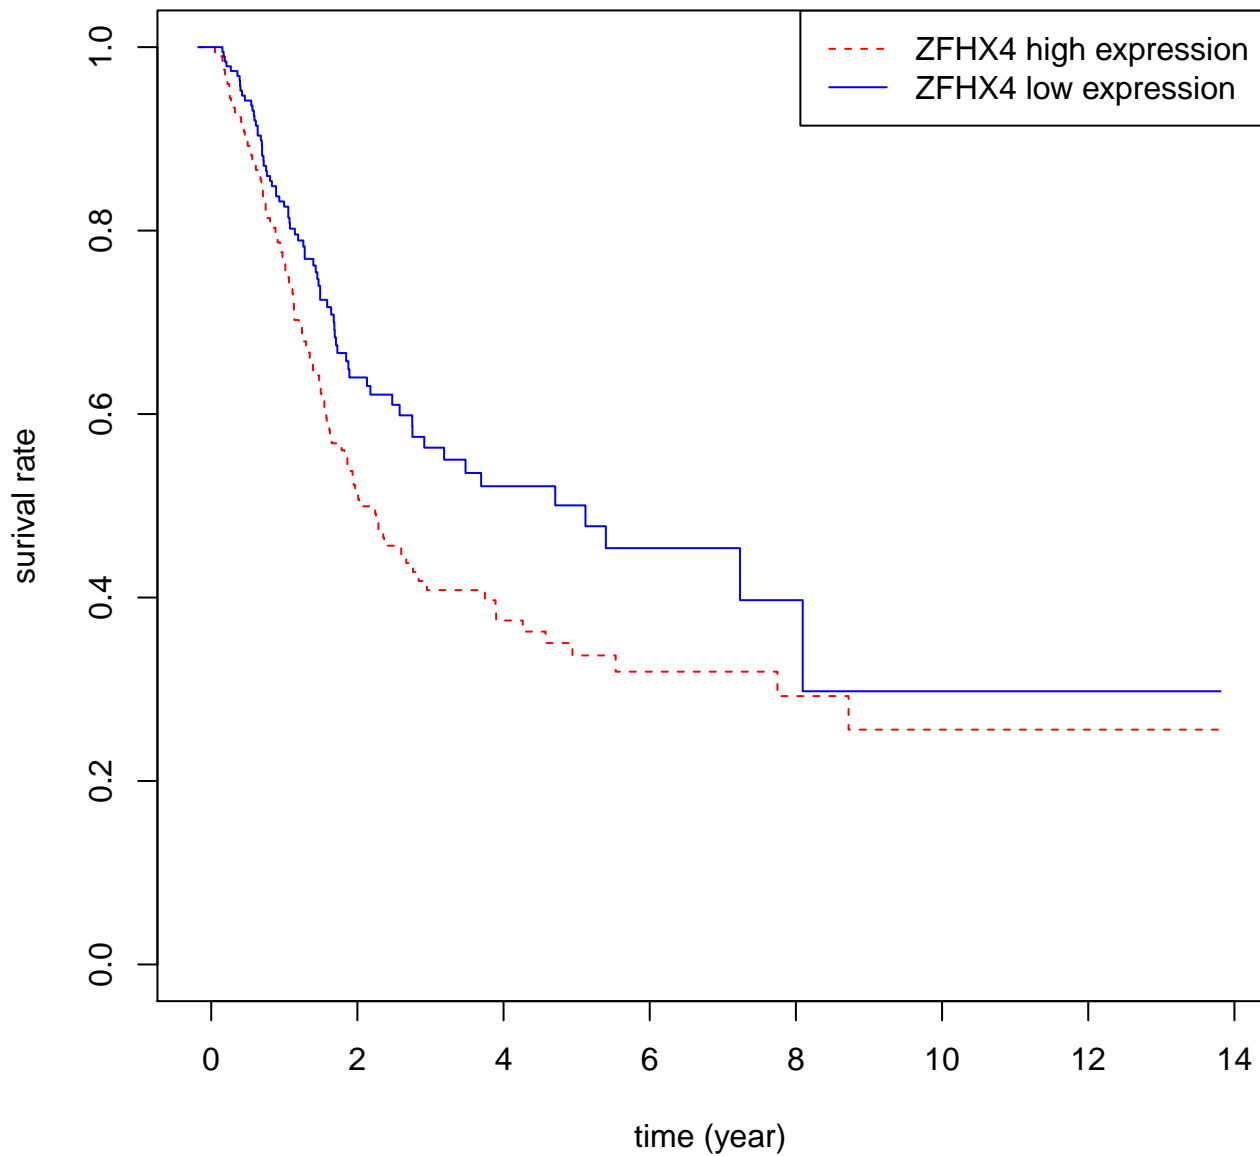

Supplement: DataSheet_1.pdf [file DataSheet_1.pdf]
